# Supplementary material for: Effective modulation of the exotic properties of two-dimensional multifunctional TM2@g-C4N3 monolayers via transition metal permutation and biaxial strain
Source: Royal Society of Chemistry journal article supplement (doi:10.1039/d3nr00984j), 2023-01-01
Supplement: d3nr00984j1.pdf [file d3nr00984j1.pdf]

## Electronic Supplementary Information (ESI)

# Effective modulation of the exotic properties of two-dimensional multifunctional $\text{TM}_2@g\text{-C}_4\text{N}_3$ monolayers via transition metal permutation and biaxial strain

De-Bing Long,<sup>1</sup> Yulin Feng,<sup>2</sup> Guoying Gao,<sup>3</sup> and Li-Ming Yang<sup>1\*</sup>

<sup>1</sup>Key Laboratory of Material Chemistry for Energy Conversion and Storage, Ministry of Education, Hubei Key Laboratory of Bioinorganic Chemistry and Materia Medica, Hubei Key Laboratory of Materials Chemistry and Service Failure, Hubei Engineering Research Center for Biomaterials and Medical Protective Materials, School of Chemistry and Chemical Engineering, Huazhong University of Science and Technology, Wuhan 430074, China. (email: [Lmyang@hust.edu.cn](mailto:Lmyang@hust.edu.cn))

<sup>2</sup>College of Physics and Electronic Science, Hubei Normal University, Huangshi 435002, China.

<sup>3</sup>School of Physics and Wuhan National High Magnetic Field Center, Huazhong University of Science and Technology, Wuhan 430074, China.

### Table of Contents:

#### (1) Test of different $U_{\text{eff}}$ values for magnetic ground states (MGS) and local magnetic moments $M$ of TM atoms in $\text{TM}_2@g\text{-C}_4\text{N}_3$ monolayers

1. The comparison of magnetic ground states (MGS) and local magnetic moments  $M$  ( $\mu_{\text{B}}/\text{TM}$ ) of TM atoms obtained at  $U_{\text{eff}} = 3$  eV and other different  $U_{\text{eff}}$  values (2, 2.5, 3.5, 4 eV): Table S1

#### (2) Stepwise high-throughput screening together with viability analysis and stability evaluation for 210 candidates

1. Initial and final geometric structures before and after fully structural relaxation of the seven adsorption configurations: Fig. S1

2. Calculated cohesive energies of 30 TM atoms and binding energies for  $\text{TM}_2@g\text{-C}_4\text{N}_3$  monolayers in form of model-3 and model-5: Table S2

3. Evolution of the total energy and temperature versus the simulation time during AIMD simulations for asymmetrical adsorbed  $\text{TM}_2@g\text{-C}_4\text{N}_3$  monolayers: Figs. S2–S7

4. Evolution of the total energy and temperature versus the simulation time during AIMD for symmetrical adsorbed  $\text{TM}_2@g\text{-C}_4\text{N}_3$  monolayers: Figs. S8–S10

5. Phonon dispersion spectra for  $\text{Co}_2@$  and  $\text{Zr}_2@g\text{-C}_4\text{N}_3$  monolayers under biaxial strains from  $-14\%$  to  $12\%$ : Figs. S11–S12

#### (3) Crystal structure information of 18 stable $\text{TM}_2@g\text{-C}_4\text{N}_3$ monolayers

1. The crystal structures, space groups, lattice parameters ( $\text{Å}$ ), and magnetic moments (total and TM,  $\mu_{\text{B}}$ ) of optimized 18  $\text{TM}_2@g\text{-C}_4\text{N}_3$  monolayers: Table S3

#### **(4) Magnetic properties**

1. Spin densities of the remaining 10 magnetic  $\text{TM}_2@g\text{-C}_4\text{N}_3$  monolayers: Fig. S13
2. Exchange energies  $E_{\text{ex}}$  ( $E_{\text{ex}} = E_{\text{AFM}} - E_{\text{FM}}$ , meV) and parameters ( $J_i$ , meV) per supercell, and Curie/Néel temperatures of 13 magnetic  $\text{TM}@g\text{-C}_4\text{N}_3$  monolayers obtained from Monte Carlo simulations: Table S4
3. Schematic diagrams of three different magnetic ordering configurations in 2D  $g\text{-C}_4\text{N}_3$  monolayer: Fig. S14
4. Comparison of collinear and non-collinear spin-polarized calculation results of pristine  $g\text{-C}_4\text{N}_3$  and  $\text{Re}_2@g\text{-C}_4\text{N}_3$  monolayers: Tables S5–S6
5. The calculated energy per transition metal atom along different magnetization orientations relative to the total energy with magnetization orientation parallel to easy axis (EA) and magnetic anisotropic energy (MAE) for  $\text{TM}_2@g\text{-C}_4\text{N}_3$  monolayers: Table S7
6. Exchange energies and parameters per supercell, average magnetic moment per TM atom, and Curie/Néel temperatures under biaxial strains from  $-10\%$  ( $-14\%$ ) to  $10\%$  for four representative materials: Table S8
7. Evolution of calculated Bader charges on TM atoms and  $g\text{-C}_4\text{N}_3$  moiety of four representative materials versus biaxial strains from  $-10\%$  ( $-14\%$ ) to  $10\%$ : Fig. S15

#### **(5) Electronic properties**

1. Calculated PBE+U and HSE06 band structures of the remaining 15  $\text{TM}_2@g\text{-C}_4\text{N}_3$  monolayers: Figs. S16–S17
2. Band gap values of  $\text{TM}_2@g\text{-C}_4\text{N}_3$  monolayers calculated at PBE+U and HSE06 levels: Table S9
3. Charge density difference of the remaining 15  $\text{TM}_2@g\text{-C}_4\text{N}_3$  monolayers: Fig. S18
4. The evolution of PDOS of different atoms near the Fermi level versus biaxial strains from  $-10\%$  ( $-14\%$ ) to  $10\%$  for four representative materials: Figs. S19–S22

#### **(6) Optical properties**

1. The evolution of optical absorption coefficient versus biaxial strains for  $\text{Co}_2@$  and  $\text{Zr}_2@g\text{-C}_4\text{N}_3$  monolayers: Figs. S23–S24

**(1) Test of different  $U_{\text{eff}}$  values for magnetic ground states (MGS) and local magnetic moments  $M$  of TM atoms in  $\text{TM}_2@g\text{-C}_4\text{N}_3$  monolayers**

Table S1 The comparison of magnetic ground states (MGS) and local magnetic moments  $M$  ( $\mu_B/\text{TM}$ ) of TM atoms obtained at  $U_{\text{eff}} = 3$  eV and other different  $U_{\text{eff}}$  values (2, 2.5, 3.5, 4 eV).

| $\text{TM}_2@g\text{-C}_4\text{N}_3$ | $U_{\text{eff}} = 2$ |      | $U_{\text{eff}} = 2.5$ |      | $U_{\text{eff}} = 3$ |      | $U_{\text{eff}} = 3.5$ |      | $U_{\text{eff}} = 4$ |      |
|--------------------------------------|----------------------|------|------------------------|------|----------------------|------|------------------------|------|----------------------|------|
|                                      | MGS                  | $M$  | MGS                    | $M$  | MGS                  | $M$  | MGS                    | $M$  | MGS                  | $M$  |
| Sc                                   | AFM2                 | 0.23 | AFM2                   | 0.24 | AFM2                 | 0.26 | AFM2                   | 0.27 | AFM2                 | 0.29 |
| V                                    | AFM2                 | 2.90 | AFM2                   | 2.92 | AFM2                 | 2.95 | AFM2                   | 2.96 | AFM2                 | 2.98 |
| Mn                                   | AFM2                 | 4.64 | AFM2                   | 4.66 | AFM2                 | 4.69 | AFM2                   | 4.72 | AFM2                 | 4.74 |
| Co                                   | FM                   | 1.79 | FM                     | 1.81 | FM                   | 1.84 | FM                     | 1.84 | FM                   | 1.85 |
| Ni                                   | AFM2                 | 0.89 | AFM2                   | 0.90 | AFM2                 | 0.92 | AFM2                   | 0.93 | AFM2                 | 0.94 |
| Zn                                   | NM                   | 0    | NM                     | 0    | NM                   | 0    | NM                     | 0    | NM                   | 0    |
| Y                                    | NM                   | 0    | NM                     | 0    | NM                   | 0    | NM                     | 0    | NM                   | 0    |
| Zr                                   | FM                   | 0.40 | FM                     | 0.41 | FM                   | 0.43 | FM                     | 0.43 | FM                   | 0.44 |
| Ru                                   | AFM1                 | 2.45 | AFM1                   | 2.48 | AFM1                 | 2.54 | AFM1                   | 2.57 | AFM1                 | 2.61 |
| Rh                                   | AFM1                 | 1.43 | AFM1                   | 1.47 | AFM1                 | 1.52 | AFM1                   | 1.56 | AFM1                 | 1.59 |
| Pd                                   | AFM2                 | 0.66 | AFM2                   | 0.69 | AFM2                 | 0.71 | AFM2                   | 0.73 | AFM2                 | 0.75 |
| Cd                                   | NM                   | 0    | NM                     | 0    | NM                   | 0    | NM                     | 0    | NM                   | 0    |
| Lu                                   | NM                   | 0    | NM                     | 0    | NM                   | 0    | NM                     | 0    | NM                   | 0    |
| Hf                                   | NM                   | 0    | NM                     | 0    | NM                   | 0    | NM                     | 0    | NM                   | 0    |
| Re                                   | AFM1                 | 4.94 | AFM1                   | 4.97 | AFM1                 | 5.04 | AFM1                   | 5.08 | AFM1                 | 5.11 |
| Os                                   | AFM1                 | 3.54 | AFM1                   | 3.56 | AFM1                 | 3.62 | AFM1                   | 3.67 | AFM1                 | 3.69 |
| Ir                                   | AFM1                 | 1.30 | AFM1                   | 1.34 | AFM1                 | 1.38 | AFM1                   | 1.42 | AFM1                 | 1.46 |
| Pt                                   | AFM1                 | 0.66 | AFM1                   | 0.68 | AFM1                 | 0.70 | AFM1                   | 0.72 | AFM1                 | 0.74 |

(2) Stepwise high-throughput screening together with viability analysis and stability evaluation for 210 candidates

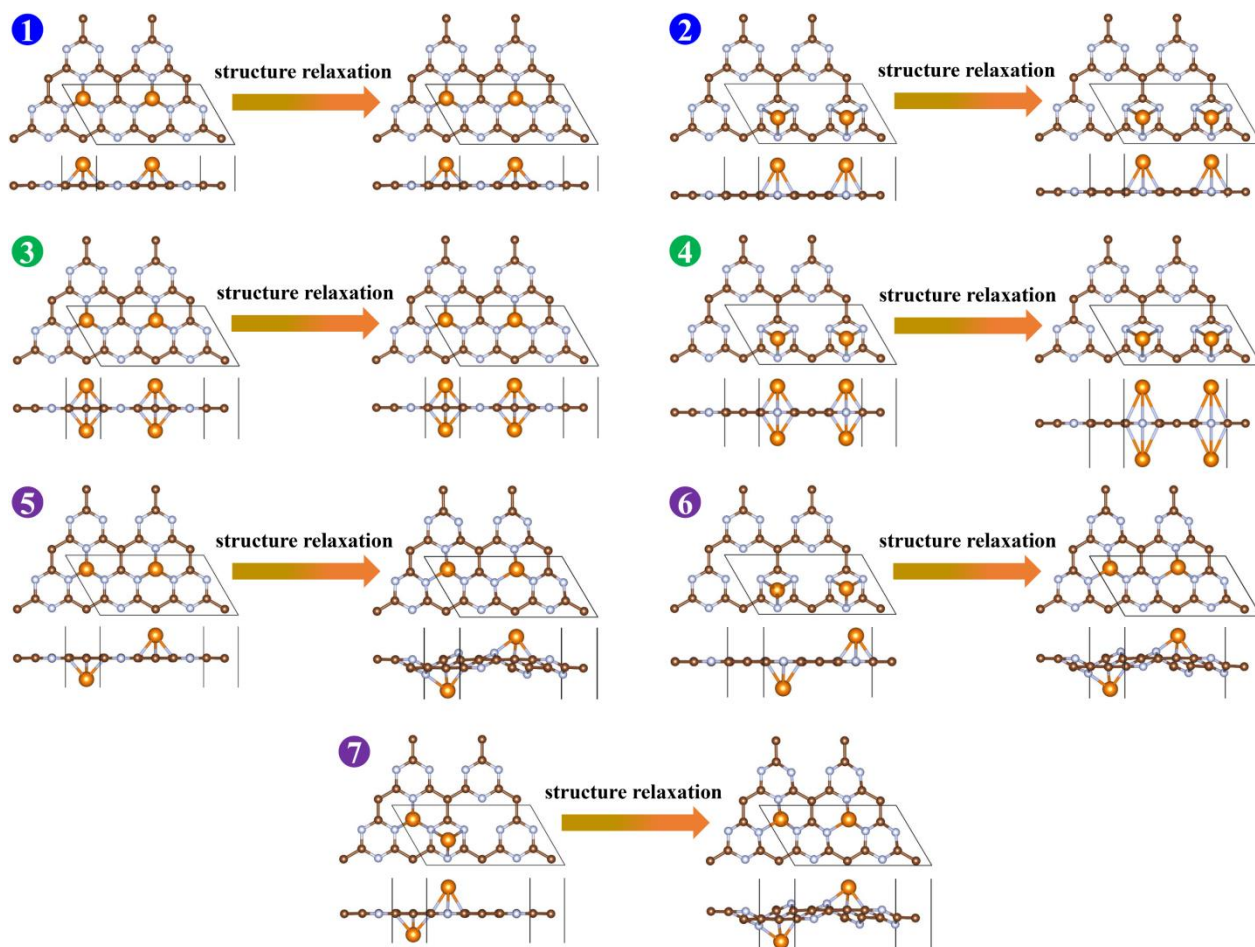

**Fig. S1.** Initial and final geometric structures before and after fully structural relaxation of the seven adsorption configurations.

**Table S2** Calculated cohesive energies ( $E_c$ ) of TM bulk and binding energies ( $E_b$ ) of the TM atoms embedded in the g-C<sub>4</sub>N<sub>3</sub> substrate in form of model-3 and model-5 as well as the calculated values of  $E_b + E_c$ . The experimental values of  $E_c$  are just for reference.

| TM | $E_c$ (eV/atom) |                     | $E_b$ (eV/atom) |         | $E_b + E_c$ (eV/atom) |         |
|----|-----------------|---------------------|-----------------|---------|-----------------------|---------|
|    | calc.           | expt. <sup>a)</sup> | model-3         | model-5 | model-3               | model-5 |
| Sc | 4.36            | 3.90                | -3.41           | -4.68   | 0.95                  | -0.31   |
| Ti | 5.50            | 4.90                | -3.40           | -4.68   | 2.09                  | 0.81    |
| V  | 5.40            | 5.30                | -3.85           | -5.45   | 1.55                  | -0.05   |
| Cr | 4.05            | 4.10                | -2.04           | -3.23   | 2.01                  | 0.82    |
| Mn | 3.29            | 2.90                | -2.24           | -3.61   | 1.05                  | -0.32   |
| Fe | 4.63            | 4.30                | -2.39           | -3.86   | 2.24                  | 0.77    |
| Co | 5.09            | 4.40                | -2.83           | -6.12   | 2.26                  | -1.02   |
| Ni | 4.74            | 4.40                | -3.64           | -5.30   | 1.11                  | -0.56   |
| Cu | 3.49            | 3.50                | -2.10           | -2.78   | 1.39                  | 0.71    |
| Zn | 1.17            | 1.40                | -0.53           | -1.77   | 0.64                  | -0.60   |
| Y  | 4.28            | 4.40                | -4.59           | -6.03   | -0.31                 | -1.75   |
| Zr | 6.27            | 6.30                | -4.60           | -6.61   | 1.67                  | -0.34   |
| Nb | 7.02            | 7.60                | -4.99           | -5.18   | 2.04                  | 1.84    |
| Mo | 6.36            | 6.80                | -4.34           | -5.76   | 2.02                  | 0.60    |
| Tc | 7.07            | 6.90                | -4.72           | -7.01   | 2.36                  | 0.06    |
| Ru | 7.03            | 6.70                | -5.46           | -7.76   | 1.57                  | -0.73   |
| Rh | 5.98            | 5.80                | -3.41           | -6.28   | 2.57                  | -0.30   |
| Pd | 3.74            | 3.90                | -1.74           | -3.83   | 2.01                  | -0.09   |
| Ag | 2.82            | 3.00                | -1.33           | -2.38   | 1.49                  | 0.44    |
| Cd | 0.94            | 1.20                | -0.42           | -1.12   | 0.51                  | -0.19   |
| Lu | 4.32            | 4.43                | -4.28           | -6.00   | 0.04                  | -1.68   |
| Hf | 6.79            | 6.40                | -4.76           | -7.00   | 2.03                  | -0.21   |
| Ta | 8.47            | 8.10                | -5.37           | -7.43   | 3.11                  | 1.04    |
| W  | 8.49            | 8.90                | -5.46           | -7.30   | 3.03                  | 1.19    |
| Re | 7.82            | 8.00                | -4.96           | -7.85   | 2.86                  | -0.04   |
| Os | 8.43            | 8.20                | -5.40           | -8.71   | 3.03                  | -0.28   |
| Ir | 7.56            | 6.90                | -5.22           | -7.77   | 2.35                  | -0.21   |
| Pt | 5.72            | 5.80                | -2.77           | -5.82   | 2.95                  | -0.10   |
| Au | 3.46            | 3.80                | -1.31           | -1.81   | 2.15                  | 1.65    |
| Hg | 0.58            | 0.70                | -0.34           | -0.38   | 0.24                  | 0.20    |

<sup>a)</sup> Kittel, C., Introduction to solid state physics. Wiley: 2005.

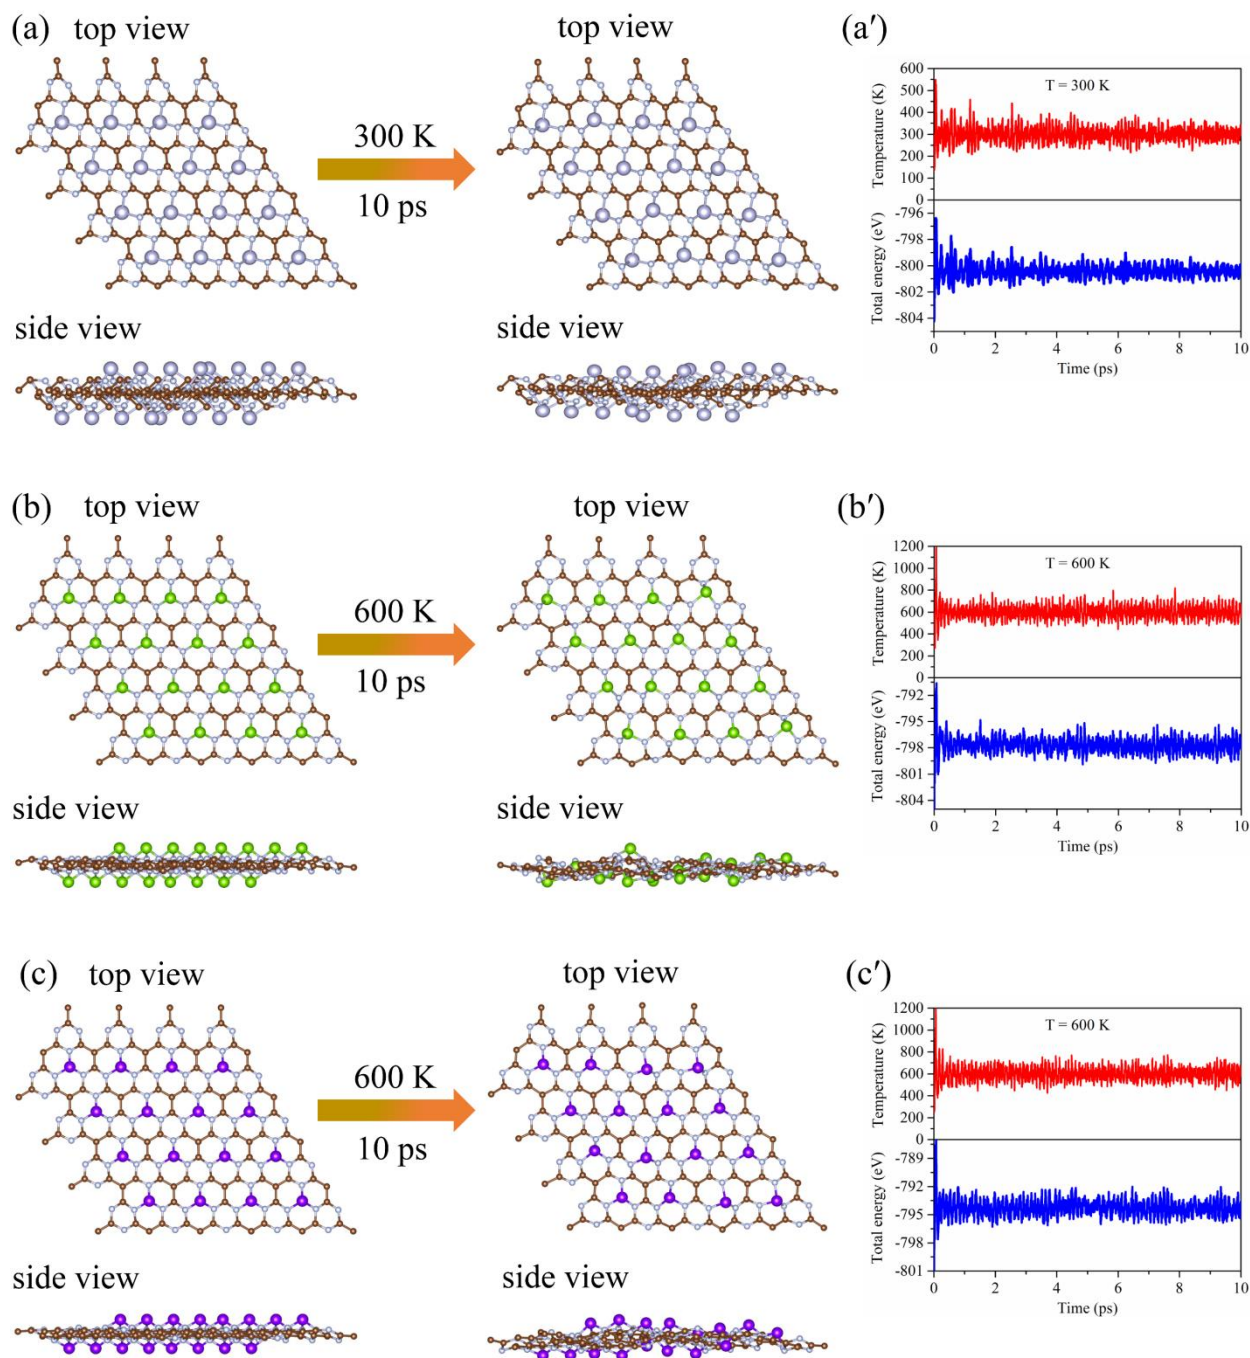

**Fig. S2** Snapshots of the initial and final frames of AIMD simulations for asymmetrical adsorbed (a) Sc<sub>2</sub>@, (b) V<sub>2</sub>@, and (c) Mn<sub>2</sub>@g-C<sub>4</sub>N<sub>3</sub> monolayers at 300, 600, and 600 K, respectively. (a')–(c') are evolutions of the total energy and temperature versus the simulation time during AIMD simulations in (a)–(c).

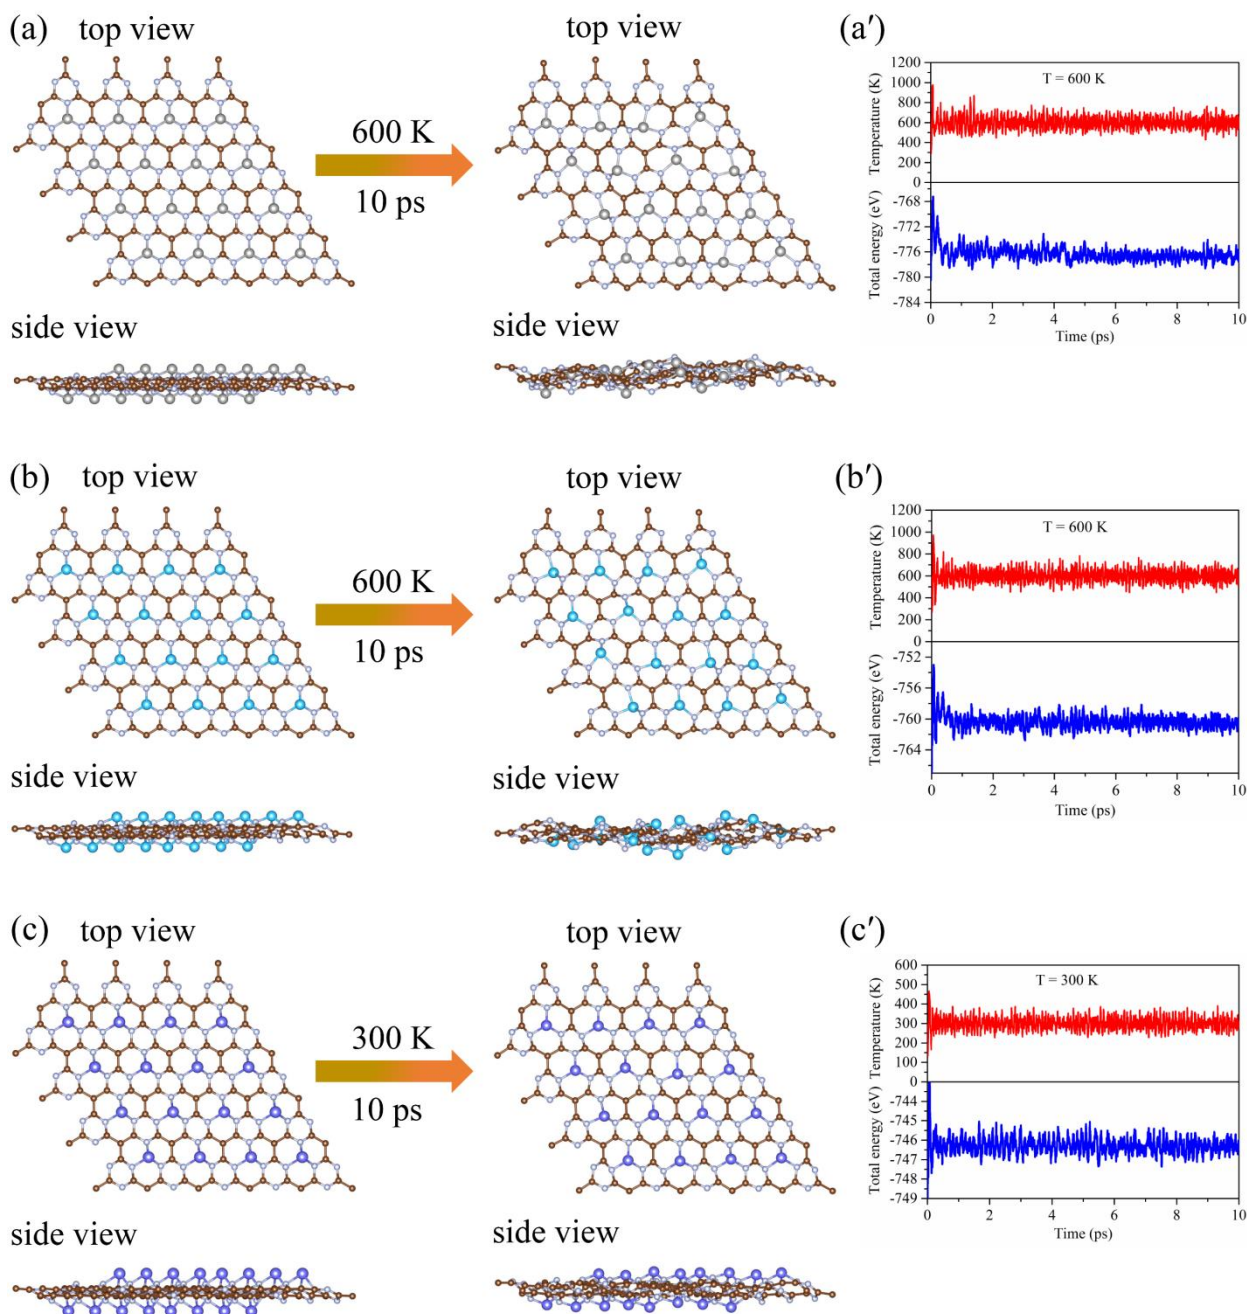

**Fig. S3** Snapshots of the initial and final frames of AIMD simulations for asymmetrical adsorbed (a) Co<sub>2</sub>@, (b) Ni<sub>2</sub>@, and (c) Zn<sub>2</sub>@-g-C<sub>4</sub>N<sub>3</sub> monolayers at 600, 600, and 300 K, respectively. (a')–(c') are evolutions of the total energy and temperature versus the simulation time during AIMD simulations in (a)–(c).

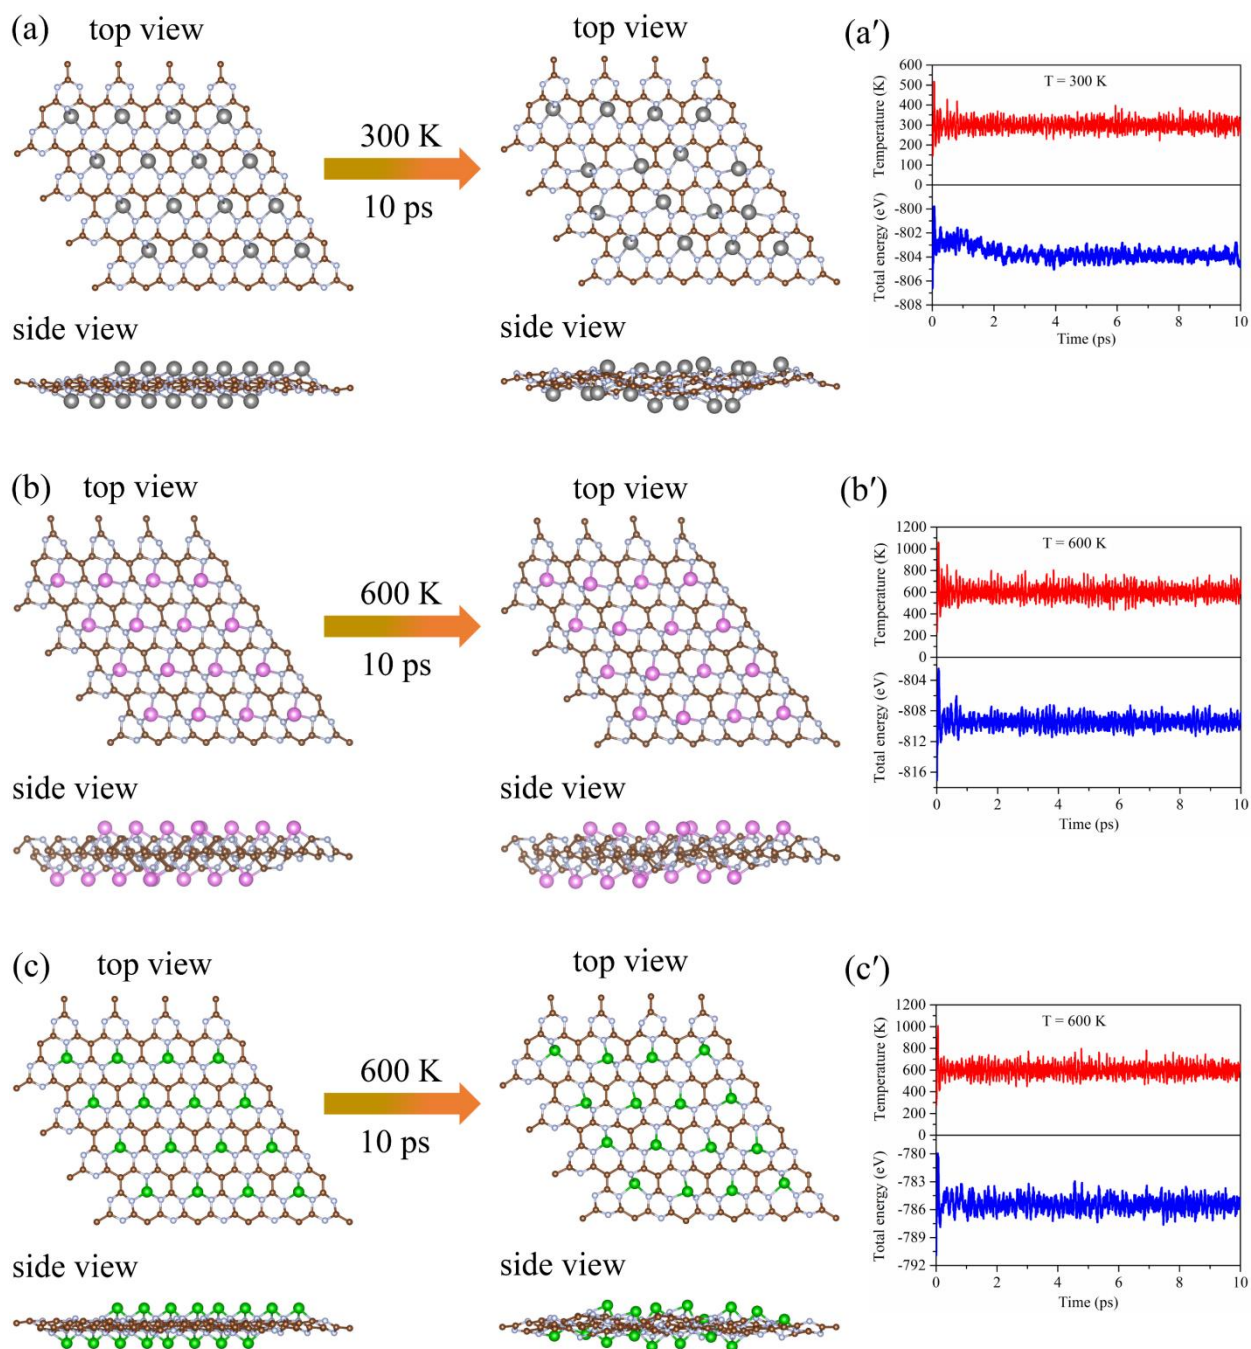

**Fig. S4** Snapshots of the initial and final frames of AIMD simulations for asymmetrical adsorbed (a) Y<sub>2</sub>@, (b) Zr<sub>2</sub>@, and (c) Ru<sub>2</sub>@g-C<sub>4</sub>N<sub>3</sub> monolayers at 300, 600, and 600 K, respectively. (a')–(c') are evolutions of the total energy and temperature versus the simulation time during AIMD simulations in (a)–(c).



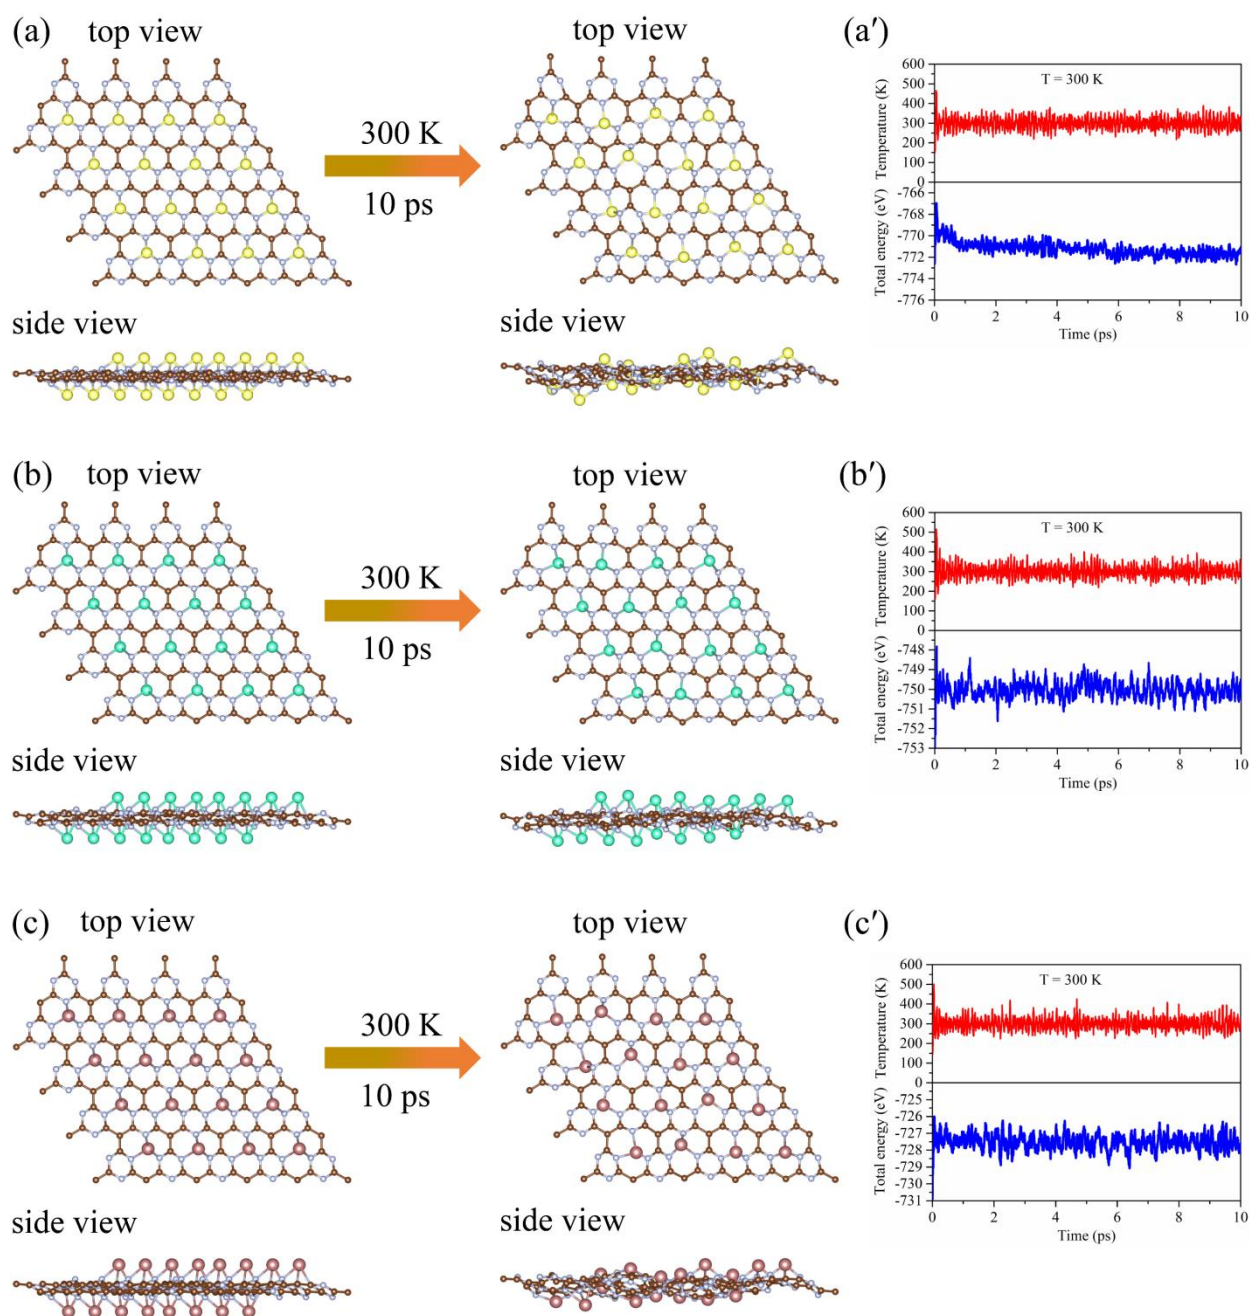

**Fig. S5** Snapshots of the initial and final frames of AIMD simulations for asymmetrical adsorbed (a)  $\text{Rh}_2@$ , (b)  $\text{Pd}_2@$ , and (c)  $\text{Cd}_2@$   $g\text{-C}_4\text{N}_3$  monolayers at 300, 300, and 300 K, respectively. (a')–(c') are evolutions of the total energy and temperature versus the simulation time during AIMD simulations in (a)–(c).

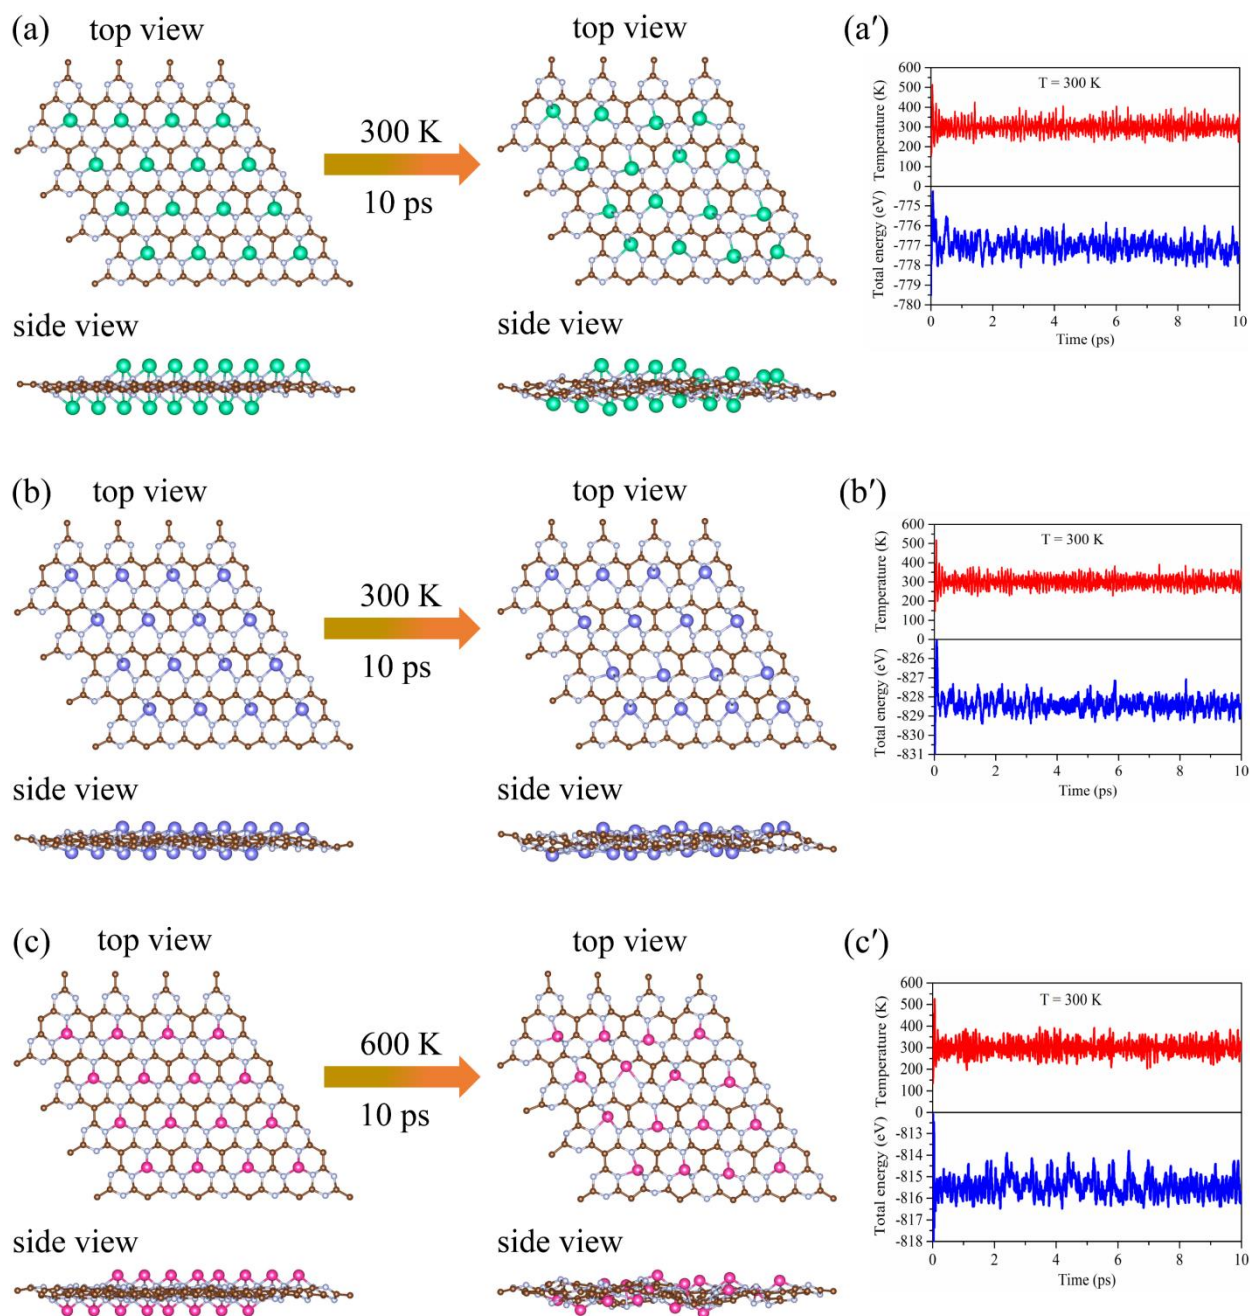

**Fig. S6** Snapshots of the initial and final frames of AIMD simulations for asymmetrical adsorbed (a) Lu<sub>2</sub>@, (b) Hf<sub>2</sub>@, and (c) Re<sub>2</sub>@- $g\text{-C}_4\text{N}_3$  monolayers at 300, 300, and 600 K, respectively. (a')–(c') are evolutions of the total energy and temperature versus the simulation time during AIMD simulations in (a)–(c).

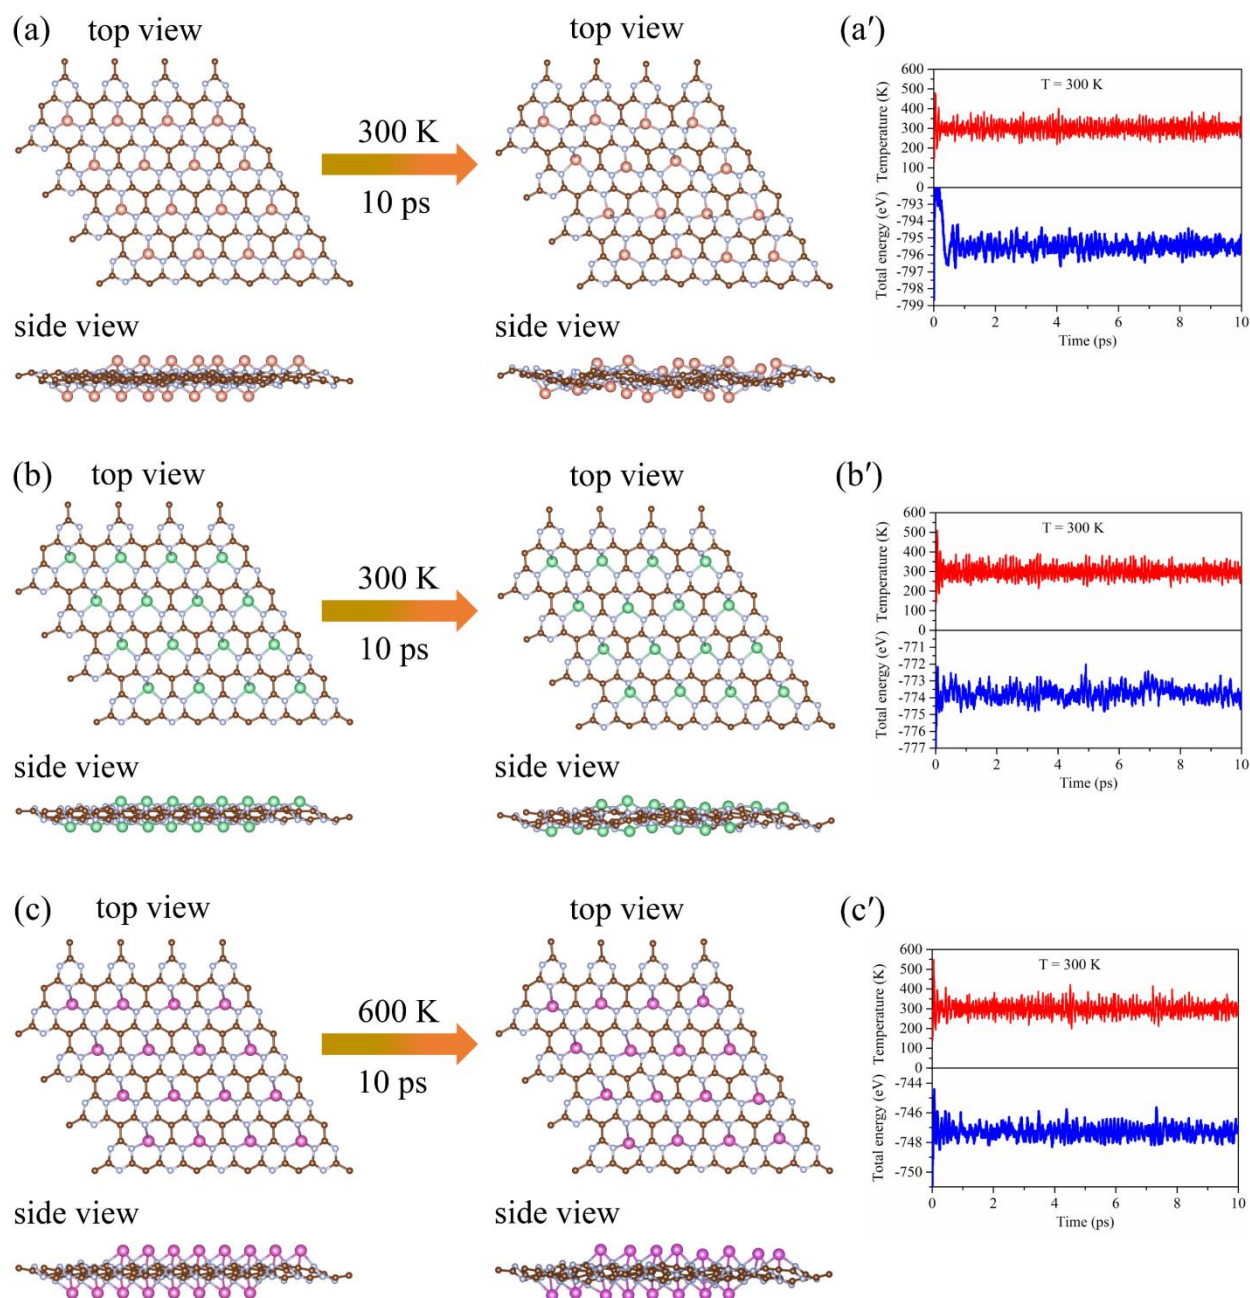

**Fig. S7** Snapshots of the initial and final frames of AIMD simulations for asymmetrical adsorbed (a)  $\text{Os}_2@$ , (b)  $\text{Ir}_2@$ , and (c)  $\text{Pt}_2@$  g- $\text{C}_4\text{N}_3$  monolayers at 300, 300, and 600 K, respectively. (a')–(c') are evolutions of the total energy and temperature versus the simulation time during AIMD simulations in (a)–(c).

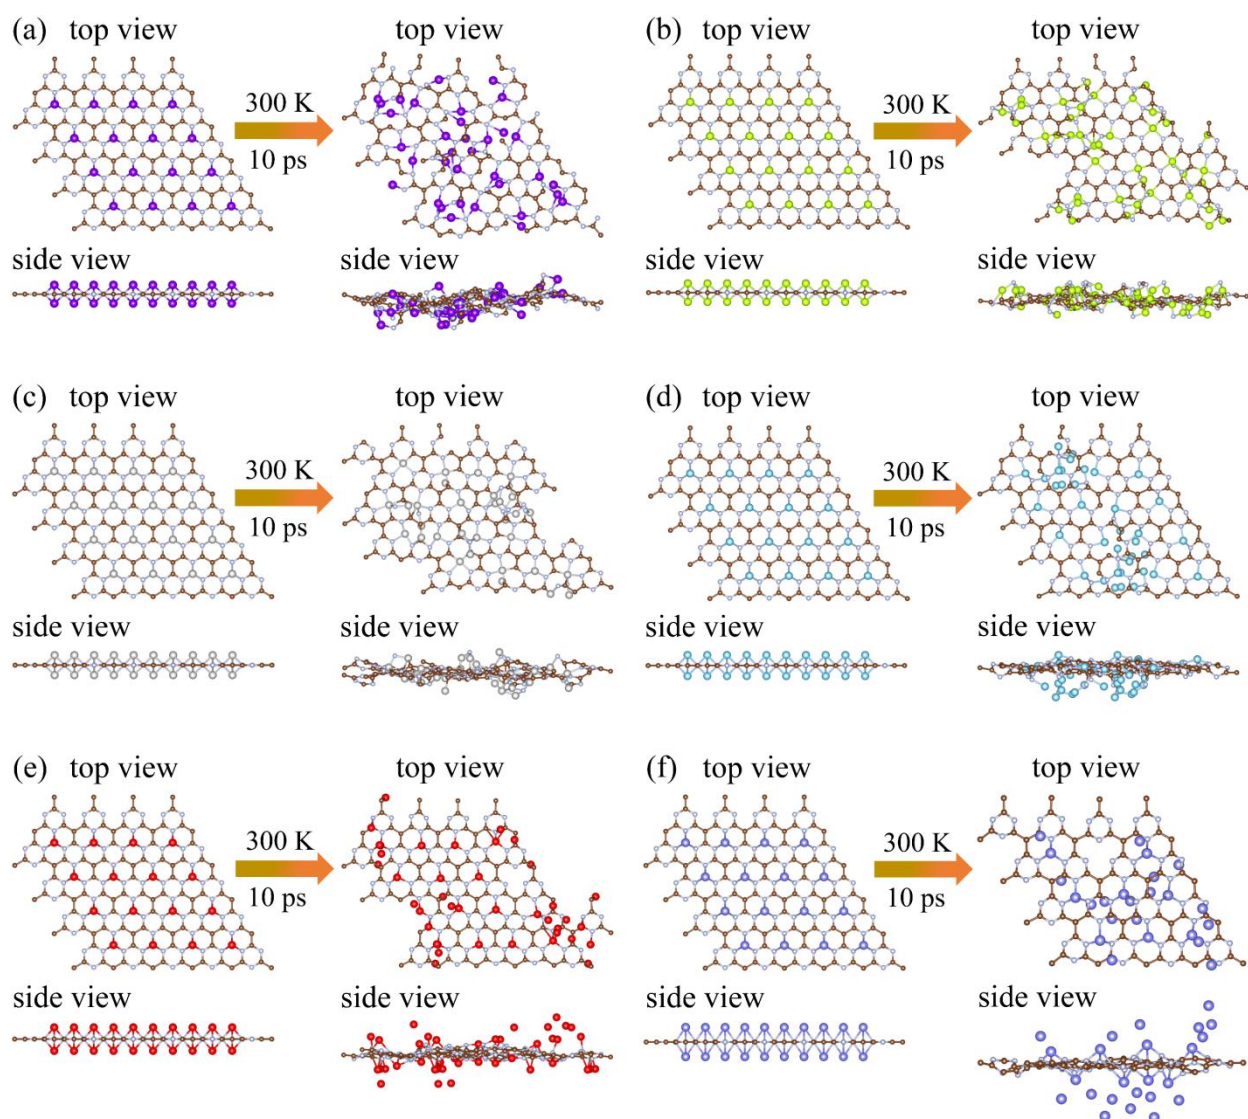

**Fig. S8** Snapshots of the initial and final frames of AIMD simulations for symmetrical adsorbed (a)  $\text{Mn}_2@$ , (b)  $\text{Fe}_2@$ , (c)  $\text{CO}_2@$ , (d)  $\text{Ni}_2@$ , (e)  $\text{Cu}_2@$ , and (f)  $\text{Zn}_2@$ g- $\text{C}_4\text{N}_3$  monolayers at 300 K.

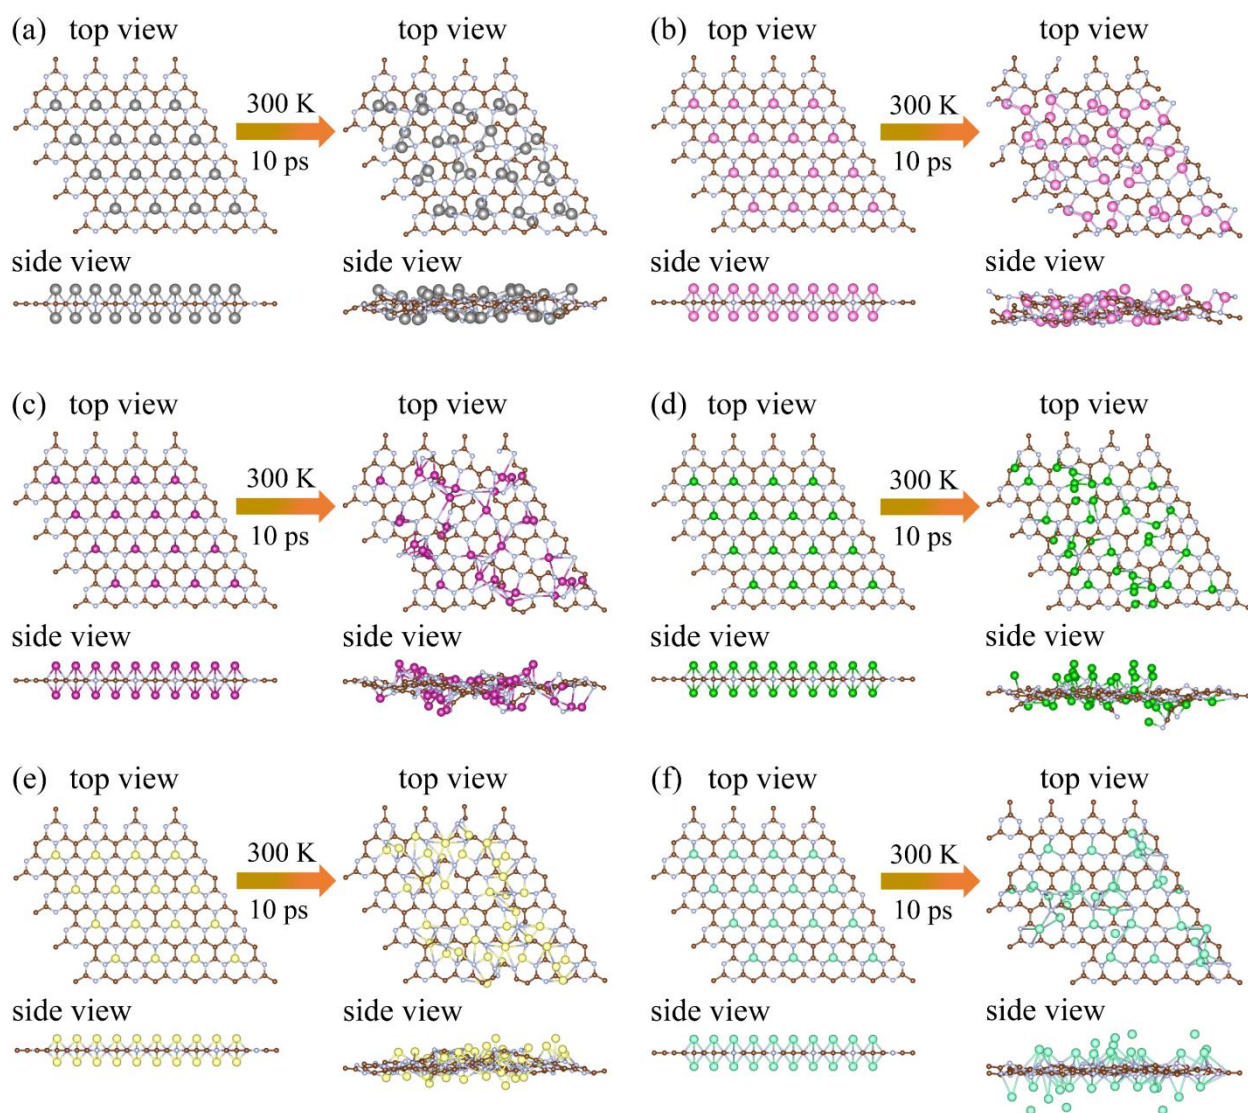

**Fig. S9** Snapshots of the initial and final frames of AIMD simulations for symmetrical adsorbed (a)  $Y_2@$ , (b)  $Zr_2@$ , (c)  $Tc_2@$ , (d)  $Ru_2@$ , (e)  $Rh_2@$ , and (f)  $Pd_2@$   $g-C_4N_3$  monolayers at 300 K.

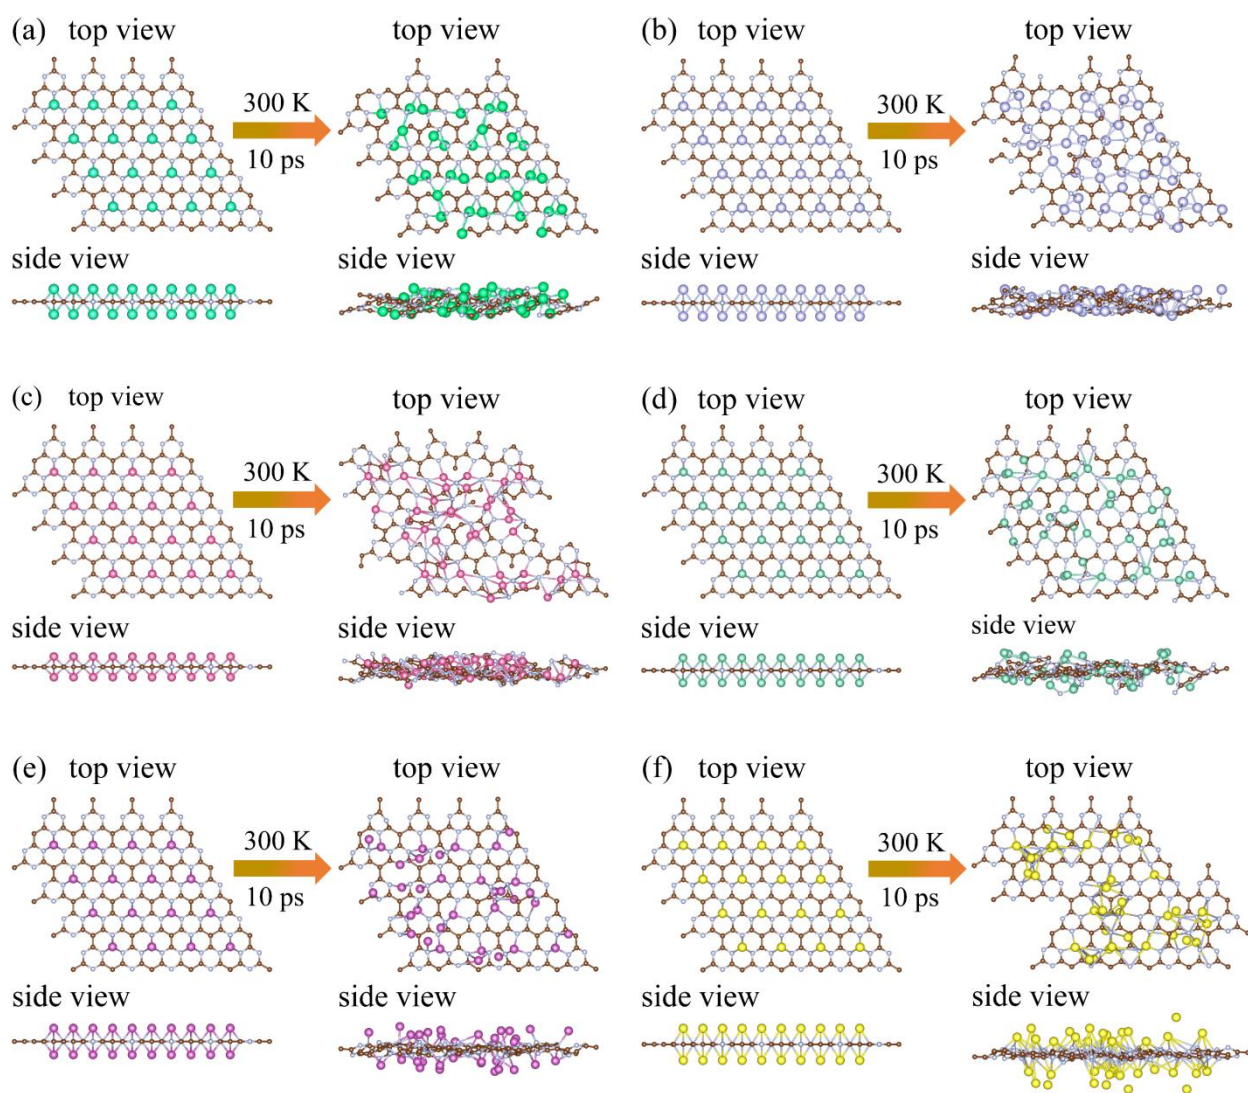

**Fig. S10** Snapshots of the initial and final frames of AIMD simulations for symmetrical adsorbed

(a)  $\text{Lu}_2@$ , (b)  $\text{Hf}_2@$ , (c)  $\text{Re}_2@$ , (d)  $\text{Ir}_2@$ , (e)  $\text{Pt}_2@$ , and (f)  $\text{Au}_2@$ - $\text{g-C}_4\text{N}_3$  monolayers at 300 K.

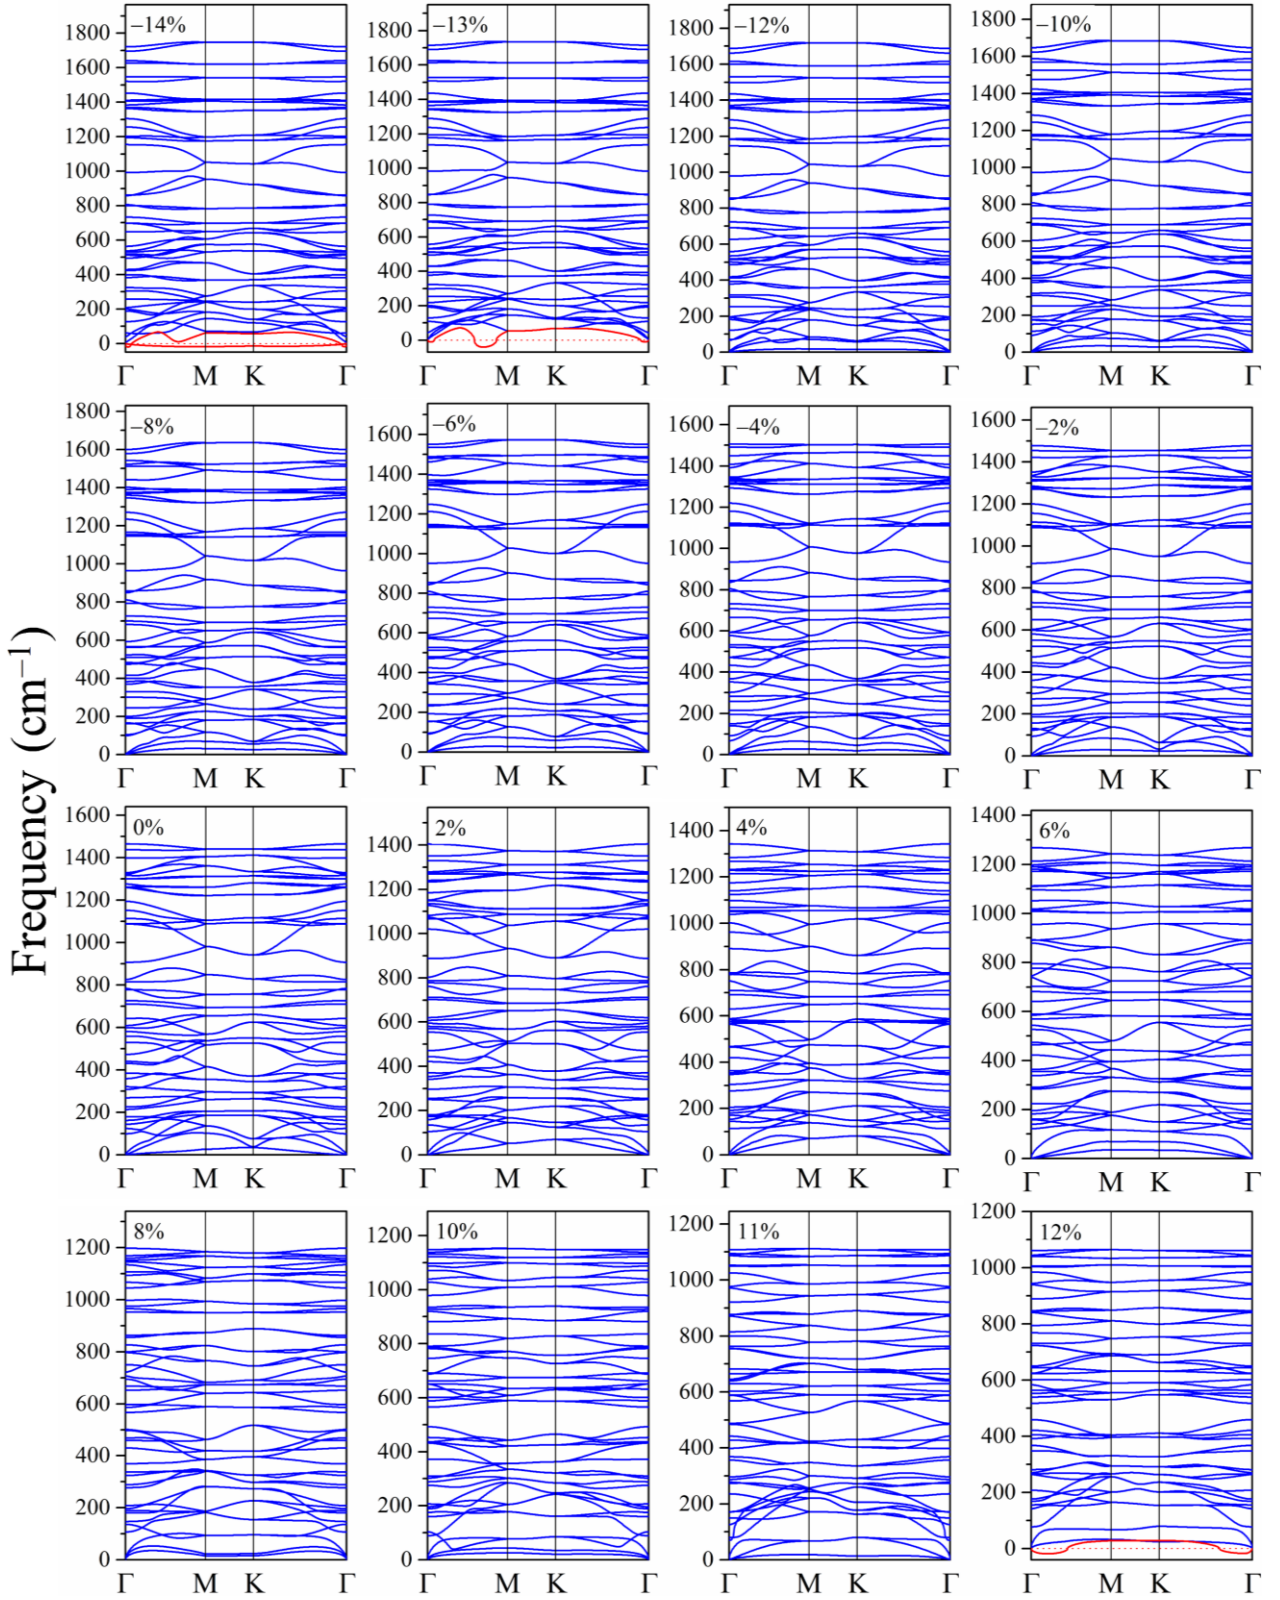

**Fig. S11** Phonon dispersion spectra for  $\text{Co}_2@g\text{-C}_4\text{N}_3$  monolayers under biaxial strains from  $-14\%$  to  $12\%$ . The red color lines show the negative frequency (instability) at critical strains ( $-14\%$ ,  $-13\%$  and  $12\%$ ), the stable interval of strain of phonon spectra is  $-12\% \sim 11\%$ .

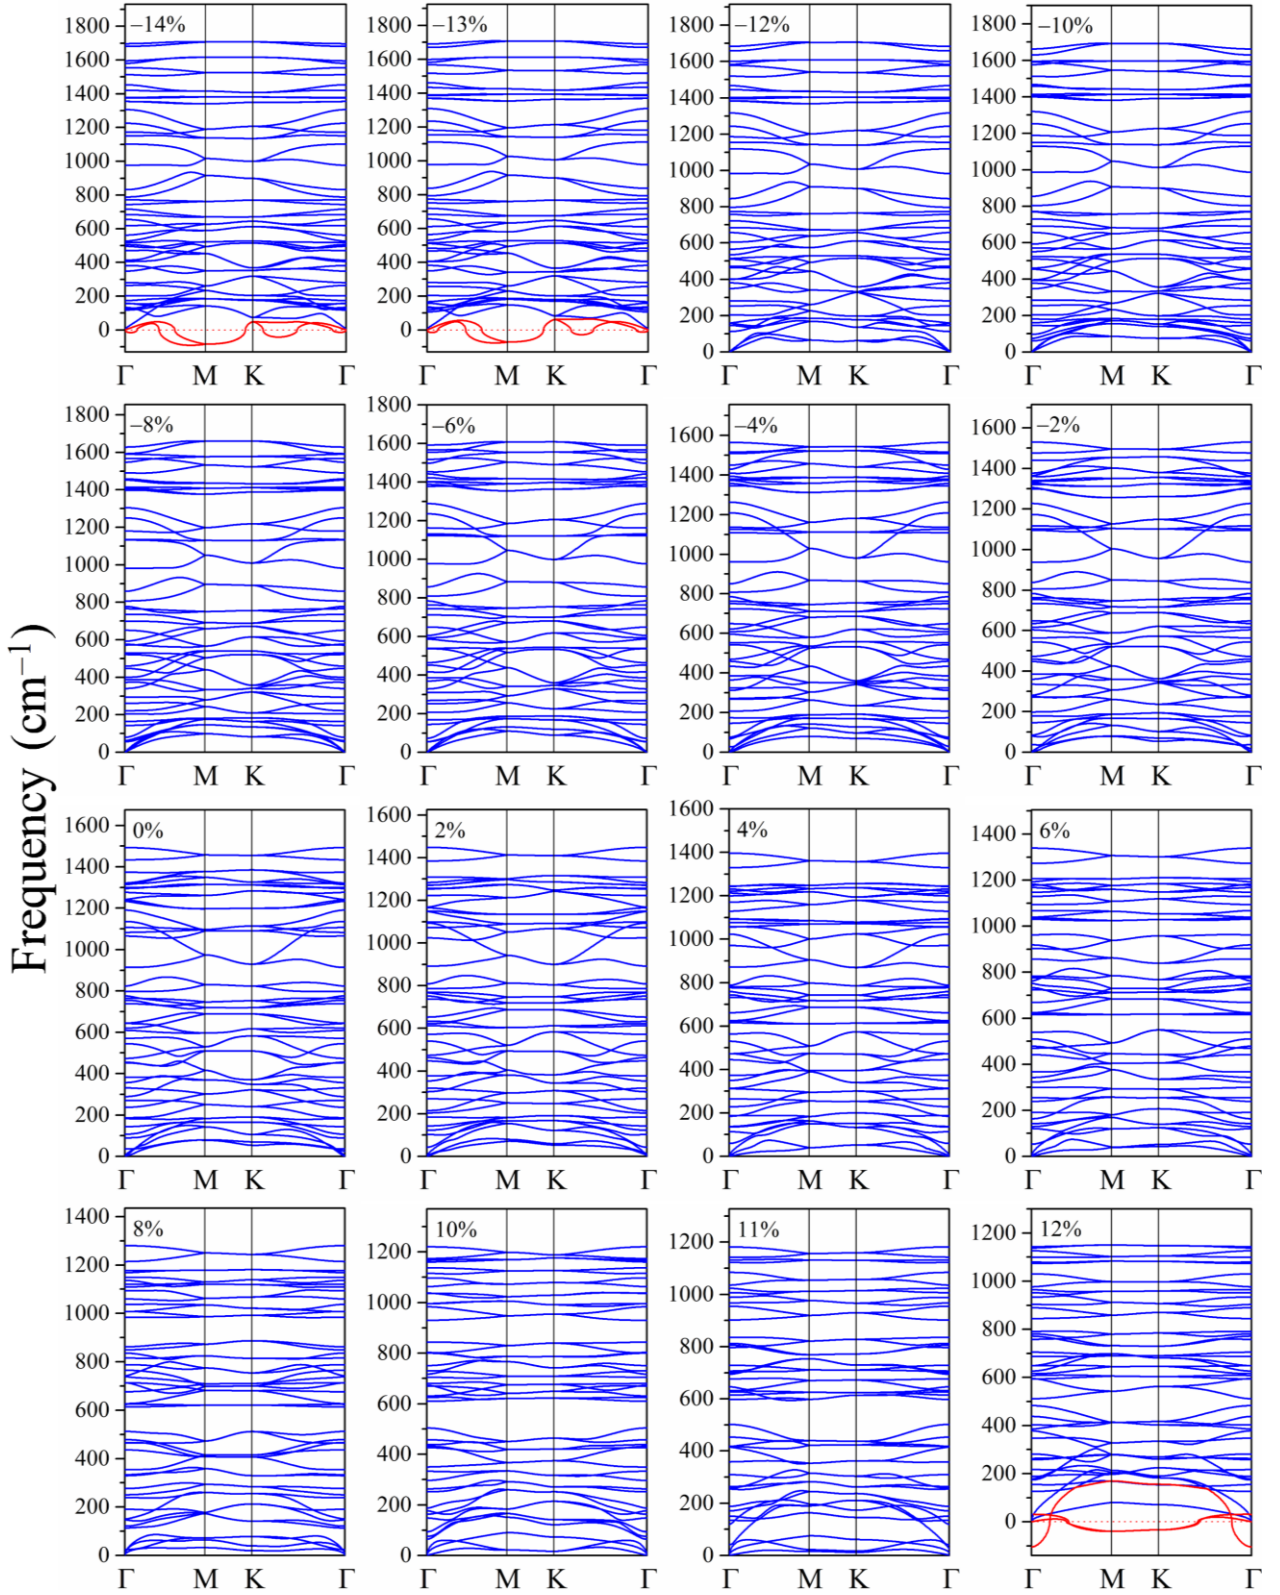

**Fig. S12** Phonon dispersion spectra for  $\text{Zr}_2@g\text{-C}_4\text{N}_3$  monolayers under biaxial strains from  $-14\%$  to  $12\%$ . The red color lines show the negative frequency (instability) at critical strains ( $-14\%$ ,  $-13\%$  and  $12\%$ ), the stable interval of strain of phonon spectra is  $-12\% \sim 11\%$ .



### (3) Crystal structure information of 18 stable TM<sub>2</sub>@g-C<sub>4</sub>N<sub>3</sub> monolayers

**Table S3** The magnetic ground states (MGS), crystal structures, space groups, lattice parameters (Å), total magnetic moment per supercell ( $M_{\text{tot}}$ ,  $\mu_B$ ), individual magnetic moment ( $M_{\text{TM}}$ ,  $\mu_B$ ) of the TM atoms, and the distance between two TM atoms ( $d_{\text{TM-TM}}$ , Å) including nearest neighbor  $d1$  and next-nearest neighbor  $d2$ , TM-N and C-N bond lengths ( $R_{\text{TM-N}}$  and  $R_{\text{C-N}}$ , Å) for the optimized 18 TM<sub>2</sub>@g-C<sub>4</sub>N<sub>3</sub> monolayers in  $2 \times 2 \times 1$  supercells.

| TM <sub>2</sub> @g-C <sub>4</sub> N <sub>3</sub> | MGS  | Crystal structure                                                                   | Space group           | Lattice parameters                      | $M_{\text{tot}}$ | $M_{\text{TM}}$                                    | $d_{\text{TM-TM}}$       | $R_{\text{TM-N}}$ | $R_{\text{C-N}}$     |
|--------------------------------------------------|------|-------------------------------------------------------------------------------------|-----------------------|-----------------------------------------|------------------|----------------------------------------------------|--------------------------|-------------------|----------------------|
| Sc <sub>2</sub> @g-C <sub>4</sub> N <sub>3</sub> | AFM2 | 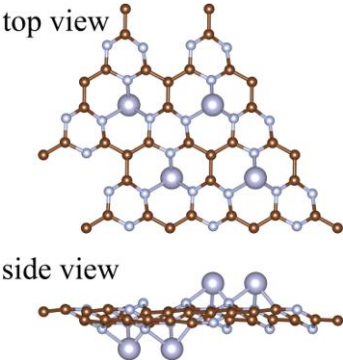   | <i>P3m1</i> (No. 156) | $a = 9.70$<br>$b = 9.70$<br>$c = 15.51$ | 0                | Sc1: 0.26<br>Sc2: -0.26<br>Sc3: 0.26<br>Sc4: -0.26 | $d1: 4.87$<br>$d2: 6.13$ | 2.10              | 1.34<br>1.39<br>1.40 |
| V <sub>2</sub> @g-C <sub>4</sub> N <sub>3</sub>  | AFM2 |   | <i>P3m1</i> (No. 156) | $a = 9.70$<br>$b = 9.70$<br>$c = 15.54$ | 0                | V1: 2.95<br>V2: -2.95<br>V3: 2.95<br>V4: -2.95     | $d1: 4.89$<br>$d2: 6.02$ | 2.06              | 1.34<br>1.37<br>1.39 |
| Mn <sub>2</sub> @g-C <sub>4</sub> N <sub>3</sub> | AFM2 |  | <i>P3m1</i> (No. 156) | $a = 9.69$<br>$b = 9.69$<br>$c = 15.59$ | 0                | Mn1: 4.69<br>Mn2: -4.69<br>Mn3: 4.69<br>Mn4: -4.69 | $d1: 4.90$<br>$d2: 6.10$ | 2.12              | 1.34<br>1.37<br>1.38 |

|                                      |      |                                                                                                                      |                  |                                         |      |                                                    |                          |      |                      |
|--------------------------------------|------|----------------------------------------------------------------------------------------------------------------------|------------------|-----------------------------------------|------|----------------------------------------------------|--------------------------|------|----------------------|
| $\text{Co}_2@g\text{-C}_4\text{N}_3$ | FM   | 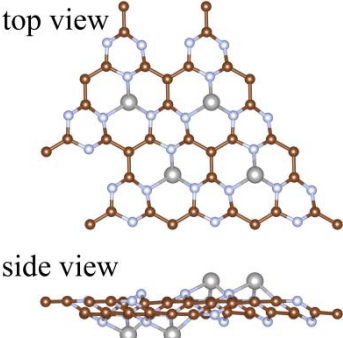 <p>top view</p> <p>side view</p>   | $P3m1$ (No. 156) | $a = 9.73$<br>$b = 9.73$<br>$c = 15.54$ | 8.00 | Co1: 1.84<br>Co2: 1.84<br>Co3: 1.84<br>Co4: 1.84   | $d1: 4.93$<br>$d2: 5.71$ | 1.90 | 1.35<br>1.37<br>1.38 |
| $\text{Ni}_2@g\text{-C}_4\text{N}_3$ | AFM2 |  <p>top view</p> <p>side view</p>   | $P3m1$ (No. 156) | $a = 9.65$<br>$b = 9.65$<br>$c = 15.62$ | 0    | Ni1: 0.92<br>Ni2: -0.92<br>Ni3: 0.92<br>Ni4: -0.92 | $d1: 4.90$<br>$d2: 5.52$ | 1.86 | 1.34<br>1.35<br>1.38 |
| $\text{Zn}_2@g\text{-C}_4\text{N}_3$ | NM   |  <p>top view</p> <p>side view</p>  | $P3m1$ (No. 156) | $a = 9.71$<br>$b = 9.71$<br>$c = 15.53$ | 0    | 0                                                  | $d1: 4.91$<br>$d2: 5.89$ | 2.02 | 1.35<br>1.36<br>1.37 |
| $\text{Y}_2@g\text{-C}_4\text{N}_3$  | NM   |  <p>top view</p> <p>side view</p> | $P3m1$ (No. 156) | $a = 9.68$<br>$b = 9.68$<br>$c = 15.55$ | 0    | 0                                                  | $d1: 4.85$<br>$d2: 6.42$ | 2.30 | 1.34<br>1.38<br>1.39 |
| $\text{Zr}_2@g\text{-C}_4\text{N}_3$ | FM   |  <p>top view</p> <p>side view</p> | $P3m1$ (No. 156) | $a = 9.05$<br>$b = 9.05$<br>$c = 18.66$ | 4.00 | Zr1: 0.58<br>Zr2: 0.27<br>Zr3: 0.58<br>Zr4: 0.27   | $d1: 4.80$<br>$d2: 6.28$ | 2.05 | 1.35<br>1.38<br>1.46 |

|                                                  |      |                                                                                                                      |                       |                                         |   |                                                    |                          |      |                      |
|--------------------------------------------------|------|----------------------------------------------------------------------------------------------------------------------|-----------------------|-----------------------------------------|---|----------------------------------------------------|--------------------------|------|----------------------|
| Ru <sub>2</sub> @g-C <sub>4</sub> N <sub>3</sub> | AFM1 | 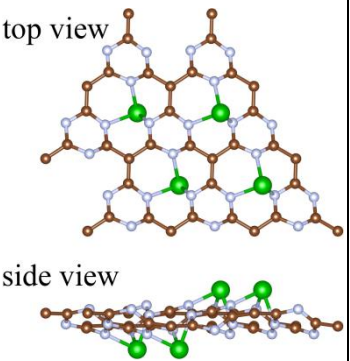 <p>top view</p> <p>side view</p>   | <i>P3m1</i> (No. 156) | $a = 9.56$<br>$b = 9.56$<br>$c = 15.92$ | 0 | Ru1: 2.54<br>Ru2: 2.54<br>Ru3: -2.54<br>Ru4: -2.54 | $d1: 4.79$<br>$d2: 5.86$ | 2.15 | 1.35<br>1.37<br>1.40 |
| Rh <sub>2</sub> @g-C <sub>4</sub> N <sub>3</sub> | AFM1 |  <p>top view</p> <p>side view</p>   | <i>P3m1</i> (No. 156) | $a = 9.67$<br>$b = 9.67$<br>$c = 15.71$ | 0 | Rh1: 1.52<br>Rh2: 1.52<br>Rh3: -1.52<br>Rh4: -1.52 | $d1: 4.90$<br>$d2: 6.11$ | 2.11 | 1.34<br>1.36<br>1.38 |
| Pd <sub>2</sub> @g-C <sub>4</sub> N <sub>3</sub> | AFM2 |  <p>top view</p> <p>side view</p>  | <i>P3m1</i> (No. 156) | $a = 9.59$<br>$b = 9.59$<br>$c = 16.00$ | 0 | Pd1: 0.71<br>Pd2: -0.71<br>Pd3: 0.71<br>Pd4: -0.71 | $d1: 4.80$<br>$d2: 6.19$ | 2.09 | 1.34<br>1.35<br>1.38 |
| Cd <sub>2</sub> @g-C <sub>4</sub> N <sub>3</sub> | NM   |  <p>top view</p> <p>side view</p> | <i>P3m1</i> (No. 156) | $a = 9.64$<br>$b = 9.64$<br>$c = 15.76$ | 0 | 0                                                  | $d1: 4.88$<br>$d2: 6.48$ | 2.36 | 1.34<br>1.36<br>1.37 |
| Lu <sub>2</sub> @g-C <sub>4</sub> N <sub>3</sub> | NM   |  <p>top view</p> <p>side view</p> | <i>P3m1</i> (No. 156) | $a = 9.67$<br>$b = 9.67$<br>$c = 15.59$ | 0 | 0                                                  | $d1: 4.86$<br>$d2: 6.42$ | 2.30 | 1.34<br>1.37<br>1.38 |

|                                                  |      |                                                                                                                      |                       |                                         |   |                                                    |                          |      |                      |
|--------------------------------------------------|------|----------------------------------------------------------------------------------------------------------------------|-----------------------|-----------------------------------------|---|----------------------------------------------------|--------------------------|------|----------------------|
| Hf <sub>2</sub> @g-C <sub>4</sub> N <sub>3</sub> | NM   | 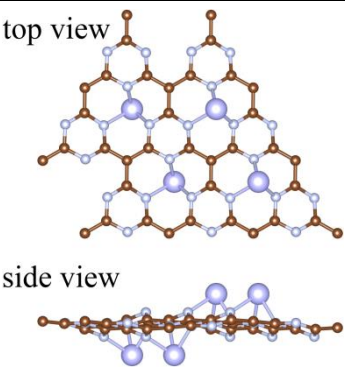 <p>top view</p> <p>side view</p>   | <i>P3m1</i> (No. 156) | $a = 9.72$<br>$b = 9.72$<br>$c = 15.38$ | 0 | 0                                                  | $d1: 4.86$<br>$d2: 6.01$ | 2.15 | 1.34<br>1.38<br>1.40 |
| Re <sub>2</sub> @g-C <sub>4</sub> N <sub>3</sub> | AFM1 |  <p>top view</p> <p>side view</p>   | <i>P3m1</i> (No. 156) | $a = 9.65$<br>$b = 9.65$<br>$c = 15.71$ | 0 | Re1: 5.04<br>Re2: 5.04<br>Re3: -5.04<br>Re4: -5.04 | $d1: 4.88$<br>$d2: 6.48$ | 2.33 | 1.35<br>1.36<br>1.37 |
| Os <sub>2</sub> @g-C <sub>4</sub> N <sub>3</sub> | AFM1 |  <p>top view</p> <p>side view</p>  | <i>P3m1</i> (No. 156) | $a = 9.67$<br>$b = 9.67$<br>$c = 15.67$ | 0 | Os1: 3.62<br>Os2: 3.62<br>Os3: -3.62<br>Os4: -3.62 | $d1: 4.88$<br>$d2: 6.36$ | 2.30 | 1.35<br>1.36<br>1.37 |
| Ir <sub>2</sub> @g-C <sub>4</sub> N <sub>3</sub> | AFM1 |  <p>top view</p> <p>side view</p> | <i>P3m1</i> (No. 156) | $a = 9.68$<br>$b = 9.68$<br>$c = 15.69$ | 0 | Ir1: 1.38<br>Ir2: 1.38<br>Ir3: -1.38<br>Ir4: -1.38 | $d1: 4.88$<br>$d2: 6.02$ | 2.10 | 1.35<br>1.36<br>1.38 |
| Pt <sub>2</sub> @g-C <sub>4</sub> N <sub>3</sub> | AFM2 |  <p>top view</p> <p>side view</p> | <i>P3m1</i> (No. 156) | $a = 9.47$<br>$b = 9.47$<br>$c = 16.07$ | 0 | Pt1: 0.70<br>Pt2: -0.70<br>Pt3: 0.70<br>Pt4: -0.70 | $d1: 4.79$<br>$d2: 6.13$ | 2.06 | 1.33<br>1.35<br>1.39 |

#### (4) Magnetic properties

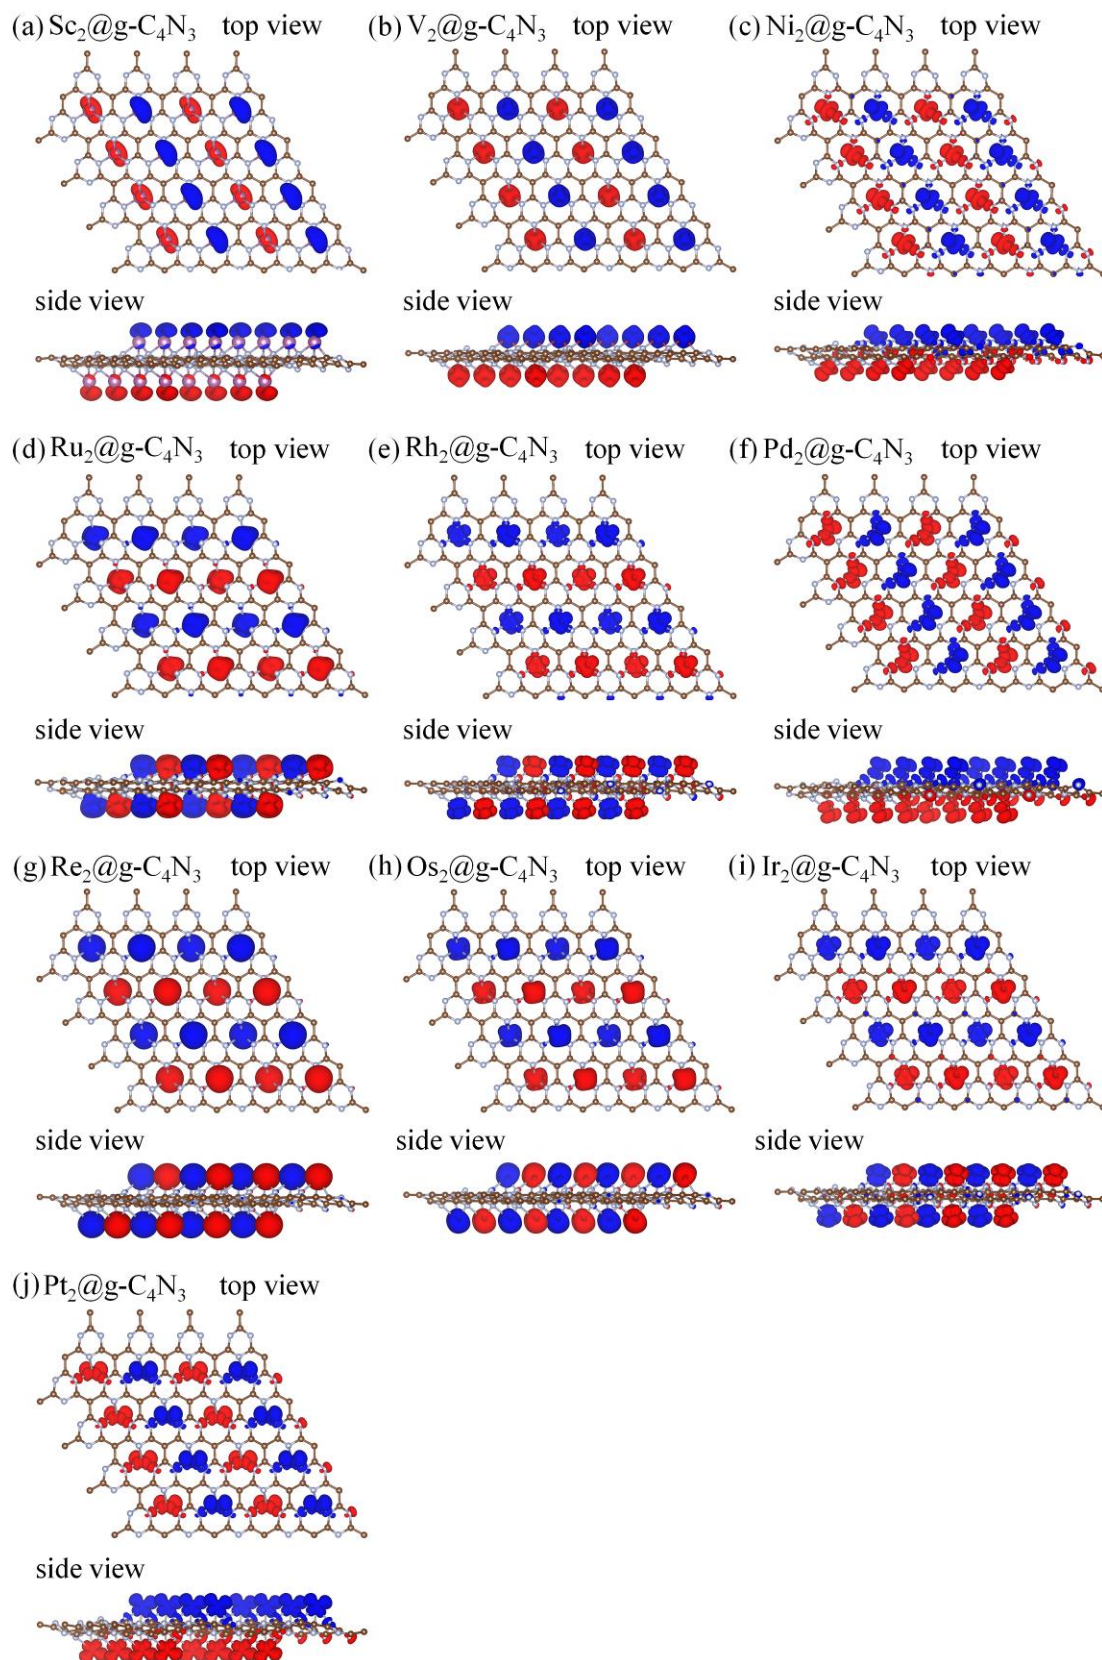

**Fig. S13** Top and side views of the spin densities ( $\Delta\rho = \rho_{\uparrow} - \rho_{\downarrow}$ ) for 2D periodic (a)  $\text{Sc}_2@$ , (b)  $\text{V}_2@$ , (c)  $\text{Ni}_2@$ , (d)  $\text{Ru}_2@$ , (e)  $\text{Rh}_2@$ , (f)  $\text{Pd}_2@$ , (g)  $\text{Re}_2@$ , (h)  $\text{Os}_2@$ , (i)  $\text{Ir}_2@$ , and (j)  $\text{Pt}_2@\text{g-C}_4\text{N}_3$  monolayers in  $2 \times 2 \times 1$  supercells at an isosurface value of  $0.03 \text{ e } \text{\AA}^{-3}$ .

**Table S4** Exchange energies  $E_{\text{ex}}$  ( $E_{\text{ex}} = E_{\text{AFM}} - E_{\text{FM}}$ , meV) and parameters ( $J_i$ , meV) per supercell, and Curie/Néel temperatures ( $T_C/T_N$ , K) of pristine g-C<sub>4</sub>N<sub>3</sub> monolayer and 13 magnetic TM<sub>2</sub>@g-C<sub>4</sub>N<sub>3</sub> monolayers obtained from Monte Carlo (MC) simulations.

| Structures                                       | $E_{\text{AFM1}} - E_{\text{FM}}$ | $E_{\text{AFM2}} - E_{\text{FM}}$ | $J_1$   | $J_2$   | $T_C/T_N$ |
|--------------------------------------------------|-----------------------------------|-----------------------------------|---------|---------|-----------|
| g-C <sub>4</sub> N <sub>3</sub>                  | 741.940                           | 770.760                           | 685.974 | 660.324 | 295       |
| Sc <sub>2</sub> @g-C <sub>4</sub> N <sub>3</sub> | 112.310                           | -13.430                           | 245.854 | -13.870 | 9.5       |
| V <sub>2</sub> @g-C <sub>4</sub> N <sub>3</sub>  | 158.630                           | -35.620                           | 2.482   | -0.251  | 13        |
| Mn <sub>2</sub> @g-C <sub>4</sub> N <sub>3</sub> | -11.360                           | -67.920                           | 0.128   | -0.193  | 49        |
| Co <sub>2</sub> @g-C <sub>4</sub> N <sub>3</sub> | 8.110                             | 46.090                            | -0.561  | 0.866   | 8.5       |
| Ni <sub>2</sub> @g-C <sub>4</sub> N <sub>3</sub> | -1.480                            | -1.720                            | -0.092  | -0.128  | < 5       |
| Zr <sub>2</sub> @g-C <sub>4</sub> N <sub>3</sub> | 99.260                            | 24.240                            | 60.589  | 8.427   | 41.5      |
| Ru <sub>2</sub> @g-C <sub>4</sub> N <sub>3</sub> | -378.330                          | -41.320                           | -6.838  | -0.395  | < 5       |
| Rh <sub>2</sub> @g-C <sub>4</sub> N <sub>3</sub> | -126.030                          | -31.580                           | -5.562  | -0.797  | < 5       |
| Pd <sub>2</sub> @g-C <sub>4</sub> N <sub>3</sub> | -57.860                           | -59.600                           | -6.673  | -7.087  | 24        |
| Re <sub>2</sub> @g-C <sub>4</sub> N <sub>3</sub> | -225.380                          | -101.080                          | -0.841  | -0.243  | < 5       |
| Os <sub>2</sub> @g-C <sub>4</sub> N <sub>3</sub> | -229.710                          | -137.640                          | -1.484  | -0.635  | < 5       |
| Ir <sub>2</sub> @g-C <sub>4</sub> N <sub>3</sub> | -51.290                           | -4.640                            | -2.920  | -0.138  | < 5       |
| Pt <sub>2</sub> @g-C <sub>4</sub> N <sub>3</sub> | -0.860                            | -55.260                           | 6.314   | -6.517  | 22.5      |

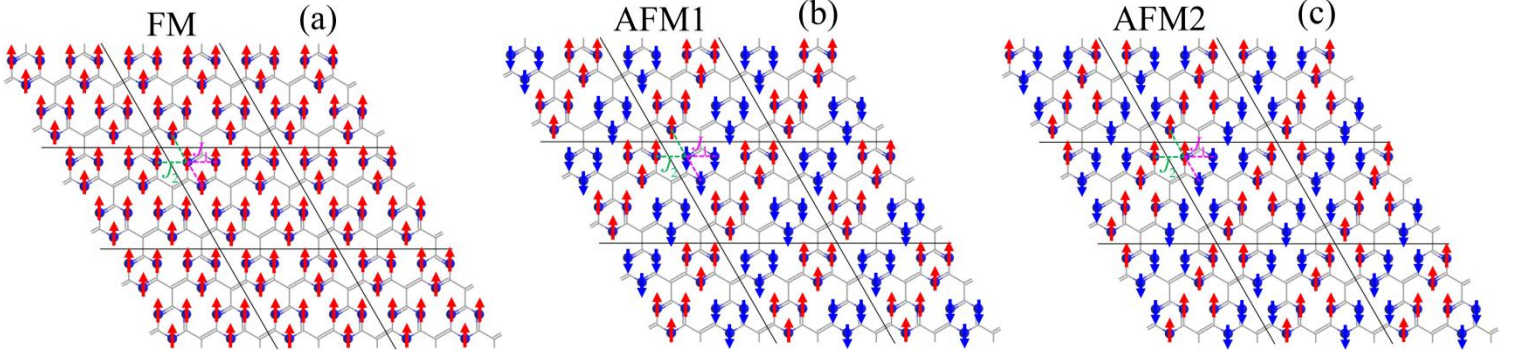

**Fig. S14** Schematic diagrams for different magnetic ordering configurations in 2D g-C<sub>4</sub>N<sub>3</sub> monolayer. (a) ferromagnetic (FM), (b) antiferromagnetic-1 (AFM1), and (c) antiferromagnetic-2 (AFM2). Blue balls are N atoms, and the arrows indicate the spin directions of the N atoms. The nearest ( $J_1$ ) and second-nearest ( $J_2$ ) exchange interactions are indicated by magenta and green dotted lines, respectively.

$$E(\text{FM}) = E_0 - 12J_1M^2 - 12J_2M^2 \quad (1)$$

$$E(\text{AFM1}) = E_0 - 12J_1M^2 + 4J_2M^2 \quad (2)$$

$$E(\text{AFM2}) = E_0 + 4J_1M^2 - 12J_2M^2 \quad (3)$$

$$J_1 = \frac{E(\text{AFM2}) - E(\text{FM})}{16M^2} \quad (4)$$

$$J_2 = \frac{E(\text{AFM1}) - E(\text{FM})}{16M^2} \quad (5)$$

**Table S5** Comparison of collinear and non-collinear spin-polarized calculation results of pristine g-C<sub>4</sub>N<sub>3</sub> monolayer.

| Collinear spin-polarized calculation     |                                                                                     |                                                                                     |                                                                                                                                                                   |                     |                      |
|------------------------------------------|-------------------------------------------------------------------------------------|-------------------------------------------------------------------------------------|-------------------------------------------------------------------------------------------------------------------------------------------------------------------|---------------------|----------------------|
| Magnetic configuration                   | Before optimization                                                                 | After optimization                                                                  | Magnetic moments ( $\mu_B$ )                                                                                                                                      | Total energies (eV) | Relative energy (eV) |
| FM                                       | 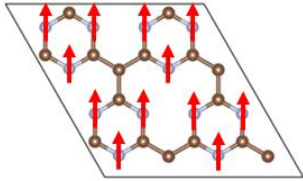   |    | N1: 0.265<br>N2: 0.265<br>N3: 0.254<br>N4: 0.254<br>N5: 0.276<br>N6: 0.276<br>N7: 0.265<br>N8: 0.265<br>N9: 0.254<br>N10: 0.254<br>N11: 0.276<br>N12: 0.276       | -236.04093          | 0                    |
| AFM1                                     |  |  | N1: 0.171<br>N2: -0.171<br>N3: 0.141<br>N4: -0.141<br>N5: -0.026<br>N6: 0.026<br>N7: -0.171<br>N8: 0.171<br>N9: -0.141<br>N10: 0.141<br>N11: 0.026<br>N12: -0.026 | -235.75519          | 0.286                |
| AFM2                                     |  |  | N1: 0.156<br>N2: -0.156<br>N3: 0.156<br>N4: -0.156<br>N5: -0.027<br>N6: 0.027<br>N7: -0.156<br>N8: 0.156<br>N9: -0.156<br>N10: 0.156<br>N11: 0.027<br>N12: -0.027 | -235.75534          | 0.286                |
| Non-collinear spin-polarized calculation |                                                                                     |                                                                                     |                                                                                                                                                                   |                     |                      |
| Magnetic configuration                   | Before optimization                                                                 | After optimization                                                                  | Magnetic moments ( $\mu_B$ )                                                                                                                                      | Total energies (eV) | Relative energy (eV) |



|      |                                                                                     |                                                                                     |                                                                                                                                                                   |            |       |
|------|-------------------------------------------------------------------------------------|-------------------------------------------------------------------------------------|-------------------------------------------------------------------------------------------------------------------------------------------------------------------|------------|-------|
| FM   | 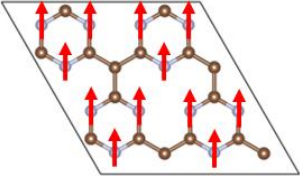   |    | N1: 0.265<br>N2: 0.265<br>N3: 0.265<br>N4: 0.265<br>N5: 0.265<br>N6: 0.265<br>N7: 0.265<br>N8: 0.265<br>N9: 0.265<br>N10: 0.265<br>N11: 0.265<br>N12: 0.265       | -236.04339 | 0     |
| AFM1 |    |    | N1: 0.174<br>N2: -0.174<br>N3: 0.231<br>N4: -0.231<br>N5: 0.231<br>N6: -0.231<br>N7: 0.174<br>N8: -0.174<br>N9: 0.231<br>N10: -0.231<br>N11: 0.231<br>N12: -0.231 | -235.30145 | 0.742 |
| AFM2 |  |  | N1: 0.214<br>N2: -0.214<br>N3: 0.214<br>N4: -0.214<br>N5: -0.136<br>N6: 0.136<br>N7: -0.214<br>N8: 0.214<br>N9: -0.214<br>N10: 0.214<br>N11: 0.136<br>N12: -0.136 | -235.27263 | 0.771 |

**Table S6** Comparison of collinear and non-collinear spin-polarized calculation results of  $\text{Re}_2@g\text{-C}_4\text{N}_3$  monolayer.

| Collinear spin-polarized calculation     |                                                                                     |                                                                                     |                                                        |                     |                      |
|------------------------------------------|-------------------------------------------------------------------------------------|-------------------------------------------------------------------------------------|--------------------------------------------------------|---------------------|----------------------|
| Magnetic configuration                   | Before optimization                                                                 | After optimization                                                                  | Magnetic moments ( $\mu_B$ )                           | Total energies (eV) | Relative energy (eV) |
| FM                                       | 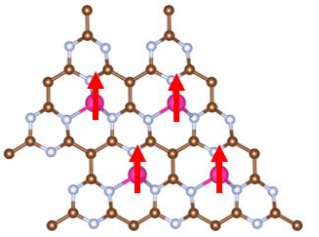   |    | Re1: 5.098<br>Re2: 5.098<br>Re3: 5.098<br>Re4: 5.098   | -262.20838          | 0                    |
| AFM1                                     |    |    | Re1: 5.036<br>Re2: 5.036<br>Re3: -5.036<br>Re4: -5.036 | -262.43376          | -0.225               |
| AFM2                                     |   |   | Re1: 5.055<br>Re2: -5.055<br>Re3: 5.055<br>Re4: -5.055 | -262.30946          | -0.101               |
| Non-collinear spin-polarized calculation |                                                                                     |                                                                                     |                                                        |                     |                      |
| Magnetic configuration                   | Before optimization                                                                 | After optimization                                                                  | Magnetic moments ( $\mu_B$ )                           | Total energies (eV) | Relative energy (eV) |
| FM                                       |  |  | Re1: 5.095<br>Re2: 5.093<br>Re3: 5.097<br>Re4: 5.097   | -262.21156          | 0                    |
| AFM1                                     |  |  | Re1: 5.037<br>Re2: 5.037<br>Re3: -5.036<br>Re4: -5.036 | -262.43584          | -0.224               |
| AFM2                                     |  |  | Re1: 5.055<br>Re2: -5.055<br>Re3: 5.055<br>Re4: -5.055 | -262.31205          | -0.101               |

**Table S7** The calculated energy per transition metal atom ( $\mu\text{eV}/\text{TM}$ ) along different magnetization orientations relative to the total energy with magnetization orientation parallel to easy axis (EA) and magnetic anisotropic energy (MAE,  $\mu\text{eV}/\text{TM}$ ) are summarized for  $\text{TM}_2@g\text{-C}_4\text{N}_3$  monolayers. The relative energy of EA was set to be 0.

| $\text{TM}_2@g\text{-C}_4\text{N}_3$ | E[100] | E[010] | E[110] | E[001] | E[111] | EA    | MAE  |
|--------------------------------------|--------|--------|--------|--------|--------|-------|------|
| Sc                                   | 18     | 100    | 35     | 0      | 23     | [001] | 100  |
| V                                    | 58     | 225    | 65     | 0      | 48     | [001] | 225  |
| Mn                                   | 5      | 10     | 15     | 0      | 20     | [001] | 20   |
| Co                                   | 35     | 10     | 8      | 0      | 33     | [001] | 35   |
| Ni                                   | 180    | 123    | 130    | 0      | 178    | [001] | 180  |
| Zr                                   | 773    | 778    | 290    | 0      | 788    | [001] | 788  |
| Ru                                   | 175    | 623    | 113    | 0      | 490    | [001] | 623  |
| Rh                                   | 820    | 95     | 323    | 0      | 815    | [001] | 820  |
| Pd                                   | 213    | 15     | 0      | 218    | 198    | [110] | 218  |
| Re                                   | 0      | 90     | 128    | 168    | 110    | [100] | 168  |
| Os                                   | 150    | 150    | 0      | 333    | 183    | [110] | 333  |
| Ir                                   | 158    | 0      | 333    | 140    | 145    | [010] | 333  |
| Pt                                   | 1135   | 865    | 553    | 0      | 138    | [001] | 1135 |

**Table S8** Exchange energies  $E_{\text{ex}}$  ( $E_{\text{ex}} = E_{\text{AFM}} - E_{\text{FM}}$ , meV) and parameters ( $J_i$ , meV) per supercell, average magnetic moment  $M$  ( $\mu_B$ ) per TM atom, and Curie/Néel temperatures ( $T_C/T_N$ , K) under biaxial strains from  $-10\%$  ( $-14\%$ ) to  $10\%$  for  $\text{Co}_2@$ ,  $\text{Zr}_2@$ ,  $\text{Mn}_2@$ , and  $\text{V}_2@$ -g- $\text{C}_4\text{N}_3$  monolayers.

| $\text{Co}_2@$ -g- $\text{C}_4\text{N}_3$ | $-10\%$                        | $-8\%$                          | $-6\%$                         | $-4\%$                         | $-2\%$                          | 0                               | 2%                              | 4%                             | 6%                              | 8%                              | 10%                             |
|-------------------------------------------|--------------------------------|---------------------------------|--------------------------------|--------------------------------|---------------------------------|---------------------------------|---------------------------------|--------------------------------|---------------------------------|---------------------------------|---------------------------------|
| FM                                        | <b>-251.96133</b>              | <b>-253.94852</b>               | <b>-255.23548</b>              | <b>-256.20703</b>              | <b>-256.98581</b>               | <b>-257.28596</b>               | <b>-256.97594</b>               | <b>-256.08339</b>              | -254.66385                      | -252.77745                      | -250.49203                      |
| AFM1                                      | -251.64044                     | -253.46765                      | -254.85276                     | -255.96702                     | -256.97741                      | -257.27785                      | -256.96762                      | -256.07545                     | -254.65514                      | -252.76721                      | -250.48060                      |
| AFM2                                      | -251.66054                     | -253.53066                      | -254.92820                     | -256.03649                     | -256.92616                      | -257.23987                      | -256.94647                      | -256.07238                     | <b>-254.66958</b>               | <b>-252.79570</b>               | <b>-250.51702</b>               |
| $E_{\text{AFM1}} - E_{\text{FM}}$         | 320.89                         | 480.87                          | 382.72                         | 240.01                         | 8.4                             | 8.11                            | 8.32                            | 7.94                           | 8.71                            | 10.24                           | 11.43                           |
| $E_{\text{AFM2}} - E_{\text{FM}}$         | 300.79                         | 417.86                          | 307.28                         | 170.54                         | 59.65                           | 46.09                           | 29.47                           | 11.01                          | -5.73                           | -18.25                          | -24.99                          |
| M                                         | 1.791                          | 1.796                           | 1.802                          | 1.812                          | 1.824                           | 1.844                           | 1.867                           | 1.875                          | 1.894                           | 1.923                           | 1.951                           |
| $J$                                       | $J_1 = 6.062$<br>$J_2 = 5.347$ | $J_1 = 10.597$<br>$J_2 = 8.142$ | $J_1 = 8.877$<br>$J_2 = 5.954$ | $J_1 = 5.957$<br>$J_2 = 3.282$ | $J_1 = -0.816$<br>$J_2 = 1.136$ | $J_1 = -0.561$<br>$J_2 = 0.866$ | $J_1 = -0.236$<br>$J_2 = 0.542$ | $J_1 = 0.087$<br>$J_2 = 0.197$ | $J_1 = 0.403$<br>$J_2 = -0.100$ | $J_1 = 0.655$<br>$J_2 = -0.309$ | $J_1 = 0.786$<br>$J_2 = -0.410$ |
| $T_C/T_N$                                 | 208                            | 305                             | 236                            | 142                            | 9                               | 8.5                             | 8                               | 6                              | 7                               | 16.5                            | 21.5                            |

| $\text{Zr}_2@$ -g- $\text{C}_4\text{N}_3$ | $-14\%$                          | $-12\%$                          | $-10\%$                          | $-8\%$                           | $-6\%$                           | $-4\%$                           | $-2\%$                          | 0                               | 2%                              | 4%                              | 6%                                | 8%                                | 10%                              |
|-------------------------------------------|----------------------------------|----------------------------------|----------------------------------|----------------------------------|----------------------------------|----------------------------------|---------------------------------|---------------------------------|---------------------------------|---------------------------------|-----------------------------------|-----------------------------------|----------------------------------|
| FM                                        | <b>-250.11052</b>                | <b>-255.82160</b>                | <b>-258.57351</b>                | <b>-261.27068</b>                | <b>-263.26412</b>                | <b>-264.68895</b>                | <b>-265.52275</b>               | <b>-265.78790</b>               | <b>-265.52975</b>               | <b>-264.80555</b>               | <b>-263.68648</b>                 | <b>-262.340763</b>                | -260.93541                       |
| AFM1                                      | -249.58492                       | -255.01236                       | -257.72345                       | -260.68366                       | -263.02174                       | -264.55353                       | -265.40282                      | -265.68864                      | -265.45534                      | -264.75545                      | -263.67832                        | -262.33571                        | -260.83445                       |
| AFM2                                      | -250.10165                       | -255.81481                       | -258.56191                       | -261.25587                       | -263.24120                       | -264.65982                       | -265.49586                      | -265.76366                      | -265.50498                      | -264.77630                      | -263.52231                        | -262.271783                       | <b>-260.96364</b>                |
| $E_{\text{AFM1}} - E_{\text{FM}}$         | 525.600                          | 809.24                           | 850.06                           | 587.02                           | 242.38                           | 135.42                           | 119.93                          | 99.26                           | 74.41                           | 50.1                            | 8.16                              | 5.053                             | 100.96                           |
| $E_{\text{AFM2}} - E_{\text{FM}}$         | 8.87                             | 6.79                             | 11.6                             | 14.81                            | 22.92                            | 29.13                            | 26.89                           | 24.24                           | 24.77                           | 29.25                           | 164.17                            | 68.98                             | -28.23                           |
| M                                         | 0.336                            | 0.346                            | 0.358                            | 0.371                            | 0.389                            | 0.403                            | 0.414                           | 0.419                           | 0.424                           | 0.435                           | 0.442                             | 0.445                             | 0.447                            |
| $J$                                       | $J_1 = 544.168$<br>$J_2 = 4.631$ | $J_1 = 892.243$<br>$J_2 = 3.759$ | $J_1 = 823.418$<br>$J_2 = 5.657$ | $J_1 = 526.383$<br>$J_2 = 6.725$ | $J_1 = 190.753$<br>$J_2 = 9.467$ | $J_1 = 93.018$<br>$J_2 = 11.210$ | $J_1 = 77.660$<br>$J_2 = 9.806$ | $J_1 = 60.589$<br>$J_2 = 8.427$ | $J_1 = 40.973$<br>$J_2 = 8.181$ | $J_1 = 22.393$<br>$J_2 = 9.232$ | $J_1 = -46.247$<br>$J_2 = 51.352$ | $J_1 = -20.959$<br>$J_2 = 24.557$ | $J_1 = 73.629$<br>$J_2 = -9.031$ |
| $T_C/T_N$                                 | 100                              | 245                              | 205                              | 135                              | 75                               | 54                               | 49                              | 41.5                            | 34                              | 28                              | 10                                | 5                                 | 8                                |

| $V_2@g-C_4N_3$ | -10%                           | -8%                              | -6%                             | -4%                             | -2%                             | 0                               | 2%                              | 4%                              | 6%                              | 8%                              | 10%                             |
|----------------|--------------------------------|----------------------------------|---------------------------------|---------------------------------|---------------------------------|---------------------------------|---------------------------------|---------------------------------|---------------------------------|---------------------------------|---------------------------------|
| FM             | -258.63834                     | -260.51049                       | -262.71802                      | -264.33130                      | -265.32042                      | -265.65474                      | -265.31972                      | -264.33069                      | -262.73079                      | -260.74988                      | -258.33754                      |
| AFM1           | -258.48512                     | -260.69137                       | -262.63669                      | -264.09302                      | -265.11713                      | -265.49611                      | -265.21029                      | -264.28558                      | -262.77152                      | -260.74545                      | -258.28633                      |
| AFM2           | -258.61151                     | -260.68917                       | -262.83188                      | -264.40861                      | -265.37347                      | -265.69036                      | -265.34754                      | -264.36781                      | -262.83566                      | -260.83029                      | -258.36567                      |
| $E_{AFM1-EFM}$ | 153.22                         | -180.88                          | 81.33                           | 238.28                          | 203.29                          | 158.63                          | 109.43                          | 45.11                           | -40.73                          | 4.43                            | 51.21                           |
| $E_{AFM2-EFM}$ | 26.83                          | -178.68                          | -113.86                         | -77.31                          | -53.05                          | -35.62                          | -27.82                          | -37.12                          | -104.87                         | -80.41                          | -28.13                          |
| M              | 2.717                          | 2.746                            | 2.766                           | 2.836                           | 2.952                           | 2.952                           | 2.968                           | 2.975                           | 2.981                           | 2.986                           | 2.99                            |
| $J$            | $J_1 = 2.318$<br>$J_2 = 0.222$ | $J_1 = -1.313$<br>$J_2 = -1.282$ | $J_1 = 1.953$<br>$J_2 = -0.804$ | $J_1 = 3.883$<br>$J_2 = -0.542$ | $J_1 = 3.213$<br>$J_2 = -0.371$ | $J_1 = 2.482$<br>$J_2 = -0.251$ | $J_1 = 1.750$<br>$J_2 = -0.197$ | $J_1 = 0.913$<br>$J_2 = -0.266$ | $J_1 = 0.182$<br>$J_2 = -0.815$ | $J_1 = 0.729$<br>$J_2 = -0.657$ | $J_1 = 1.105$<br>$J_2 = -0.238$ |
| $T_C/T_N$      | 9                              | < 5                              | < 5                             | 18.5                            | 16                              | 13                              | 9                               | < 5                             | < 5                             | < 5                             | < 5                             |

| $Mn_2@g-C_4N_3$ | -10%                             | -8%                              | -6%                              | -4%                              | -2%                              | 0                               | 2%                              | 4%                              | 6%                              | 8%                              | 10%                              |
|-----------------|----------------------------------|----------------------------------|----------------------------------|----------------------------------|----------------------------------|---------------------------------|---------------------------------|---------------------------------|---------------------------------|---------------------------------|----------------------------------|
| FM              | -260.23556                       | -263.34844                       | -265.76293                       | -267.49225                       | -268.53199                       | -268.88016                      | -268.53572                      | -267.52249                      | -265.89266                      | -263.72717                      | -261.12919                       |
| AFM1            | -260.45080                       | -263.51882                       | -265.90249                       | -267.59159                       | -268.58463                       | -268.89152                      | -268.52121                      | -267.49765                      | -265.87130                      | -263.72309                      | -261.15011                       |
| AFM2            | -260.33062                       | -263.44773                       | -265.86508                       | -267.58480                       | -268.61087                       | -268.94808                      | -268.59936                      | -267.58277                      | -265.94491                      | -263.76152                      | -261.14104                       |
| $E_{AFM1-EFM}$  | -215.24                          | -170.38                          | -139.56                          | -99.34                           | -52.64                           | -11.36                          | 14.51                           | 24.84                           | 21.36                           | 4.08                            | -20.92                           |
| $E_{AFM2-EFM}$  | -95.06                           | -99.29                           | -102.15                          | -92.55                           | -78.88                           | -67.92                          | -63.64                          | -60.28                          | -52.25                          | -34.35                          | -11.85                           |
| M               | 4.604                            | 4.63                             | 4.648                            | 4.663                            | 4.678                            | 4.691                           | 4.706                           | 4.723                           | 4.742                           | 4.761                           | 4.769                            |
| $J$             | $J_1 = -0.922$<br>$J_2 = -0.261$ | $J_1 = -0.666$<br>$J_2 = -0.274$ | $J_1 = -0.492$<br>$J_2 = -0.284$ | $J_1 = -0.297$<br>$J_2 = -0.259$ | $J_1 = -0.075$<br>$J_2 = -0.223$ | $J_1 = 0.128$<br>$J_2 = -0.193$ | $J_1 = 0.265$<br>$J_2 = -0.182$ | $J_1 = 0.316$<br>$J_2 = -0.173$ | $J_1 = 0.275$<br>$J_2 = -0.151$ | $J_1 = 0.124$<br>$J_2 = -0.100$ | $J_1 = -0.088$<br>$J_2 = -0.035$ |
| $T_N$           | < 5                              | < 5                              | < 5                              | < 5                              | 24                               | 49                              | 49                              | 50.5                            | 44                              | 25                              | 24                               |

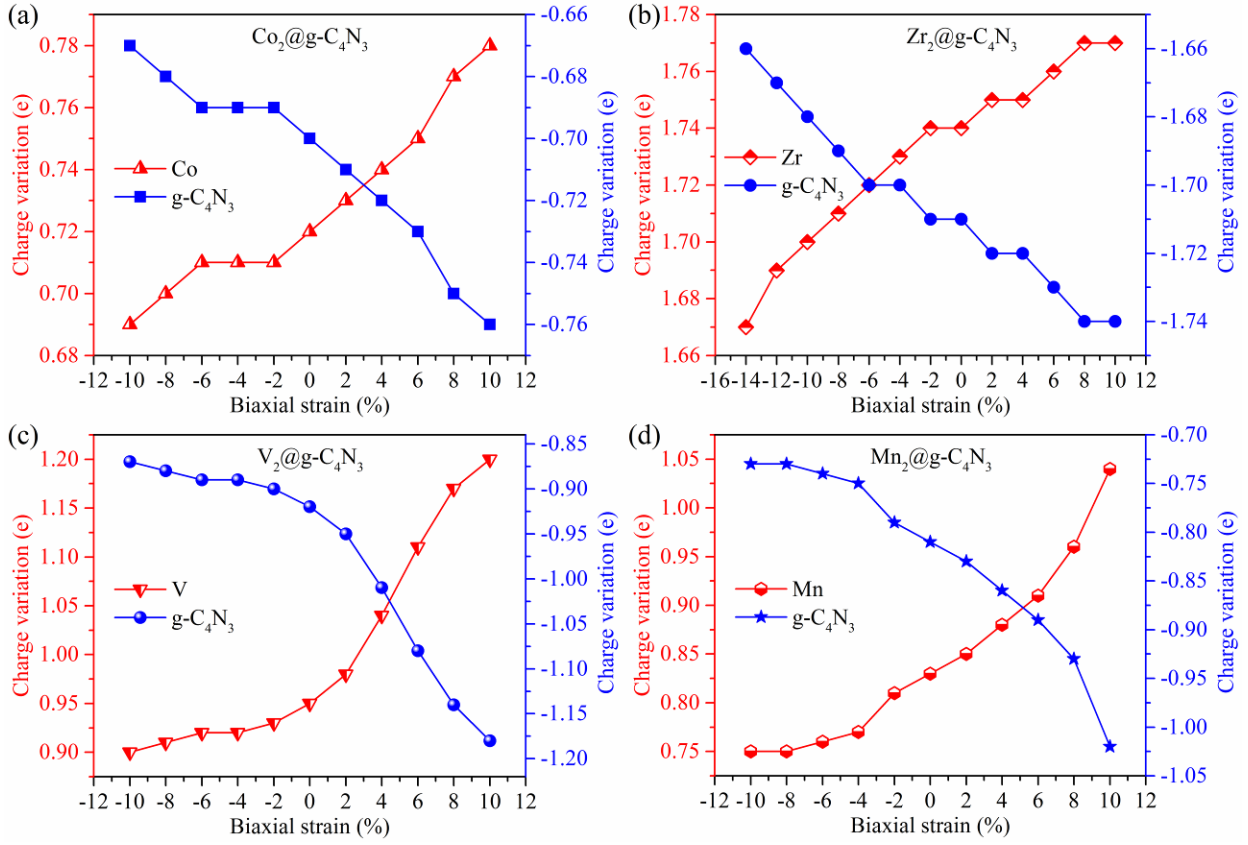

**Fig. 15** (a)–(d) are the evolutions of calculated Bader charges on TM atoms and g-C<sub>4</sub>N<sub>3</sub> moiety of four representative materials versus biaxial strains from -10% (-14%) to 10%.

## (5) Electronic properties

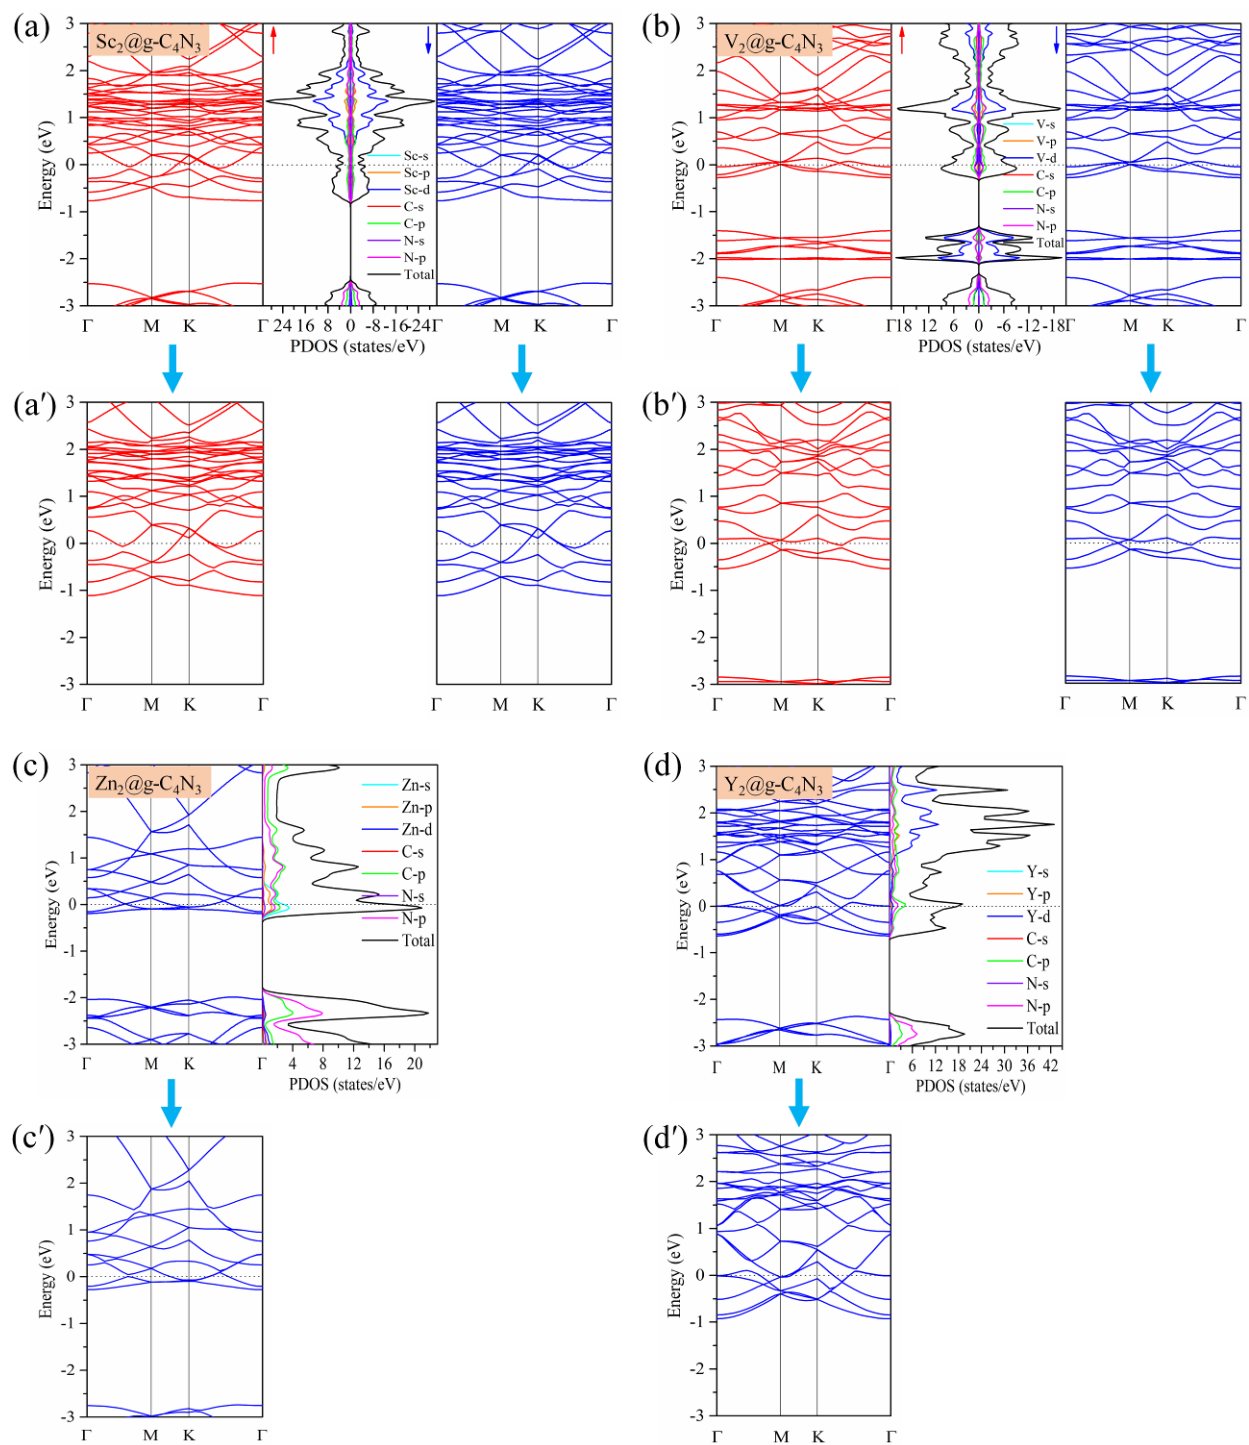

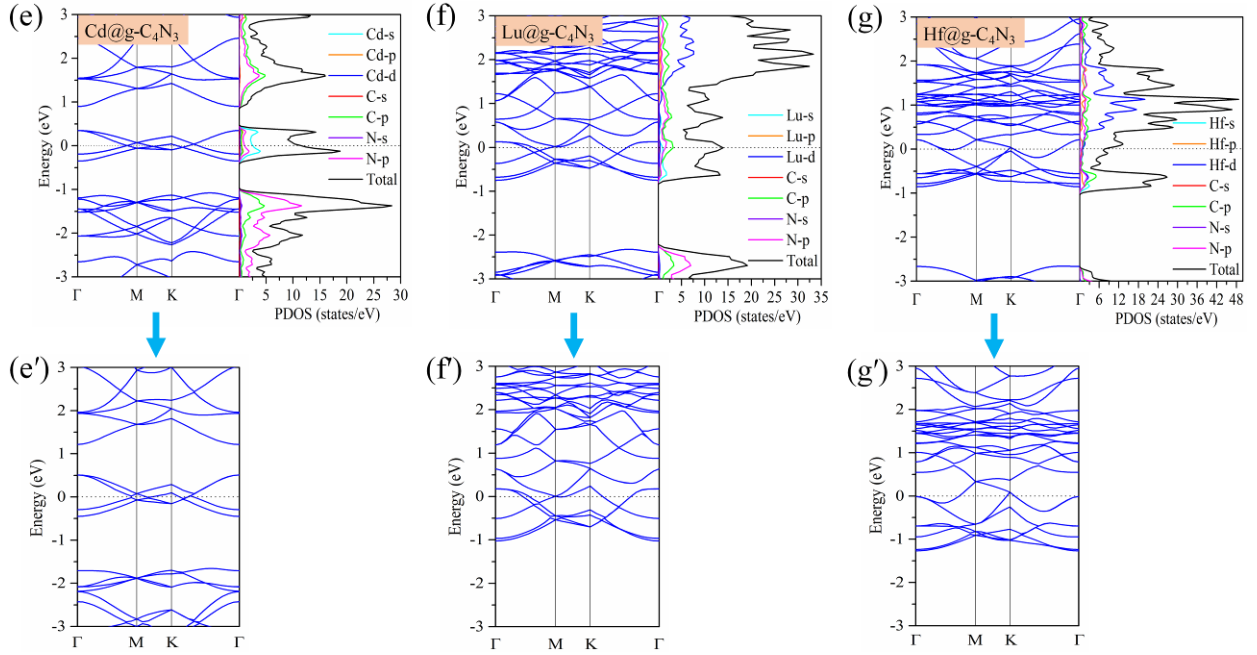

**Figure S16** The band structures and PDOS for (a)  $\text{Sc}_2@$ , (b)  $\text{V}_2@$ , (c)  $\text{Zn}_2@$ , (d)  $\text{Y}_2@$ , (e)  $\text{Cd}_2@$ , (f)  $\text{Lu}_2@$  and (g)  $\text{Hf}_2@$ - $\text{g-C}_4\text{N}_3$  monolayers calculated at PBE+U level. (a')–(g') are band structures calculated at HSE06 level.  $\Gamma$  (0, 0, 0), M (0, 1/2, 0), and K ( $-1/3$ ,  $2/3$ , 0) are high symmetry points in the first Brillouin zone in reciprocal space. The PDOS of TM- $s$ , TM- $p$ , TM- $d$ , C- $s$ , C- $p$ , N- $s$ , N- $p$ , and TDOS are plotted in light blue, orange, blue, red, green, violet, magenta, and black, respectively.



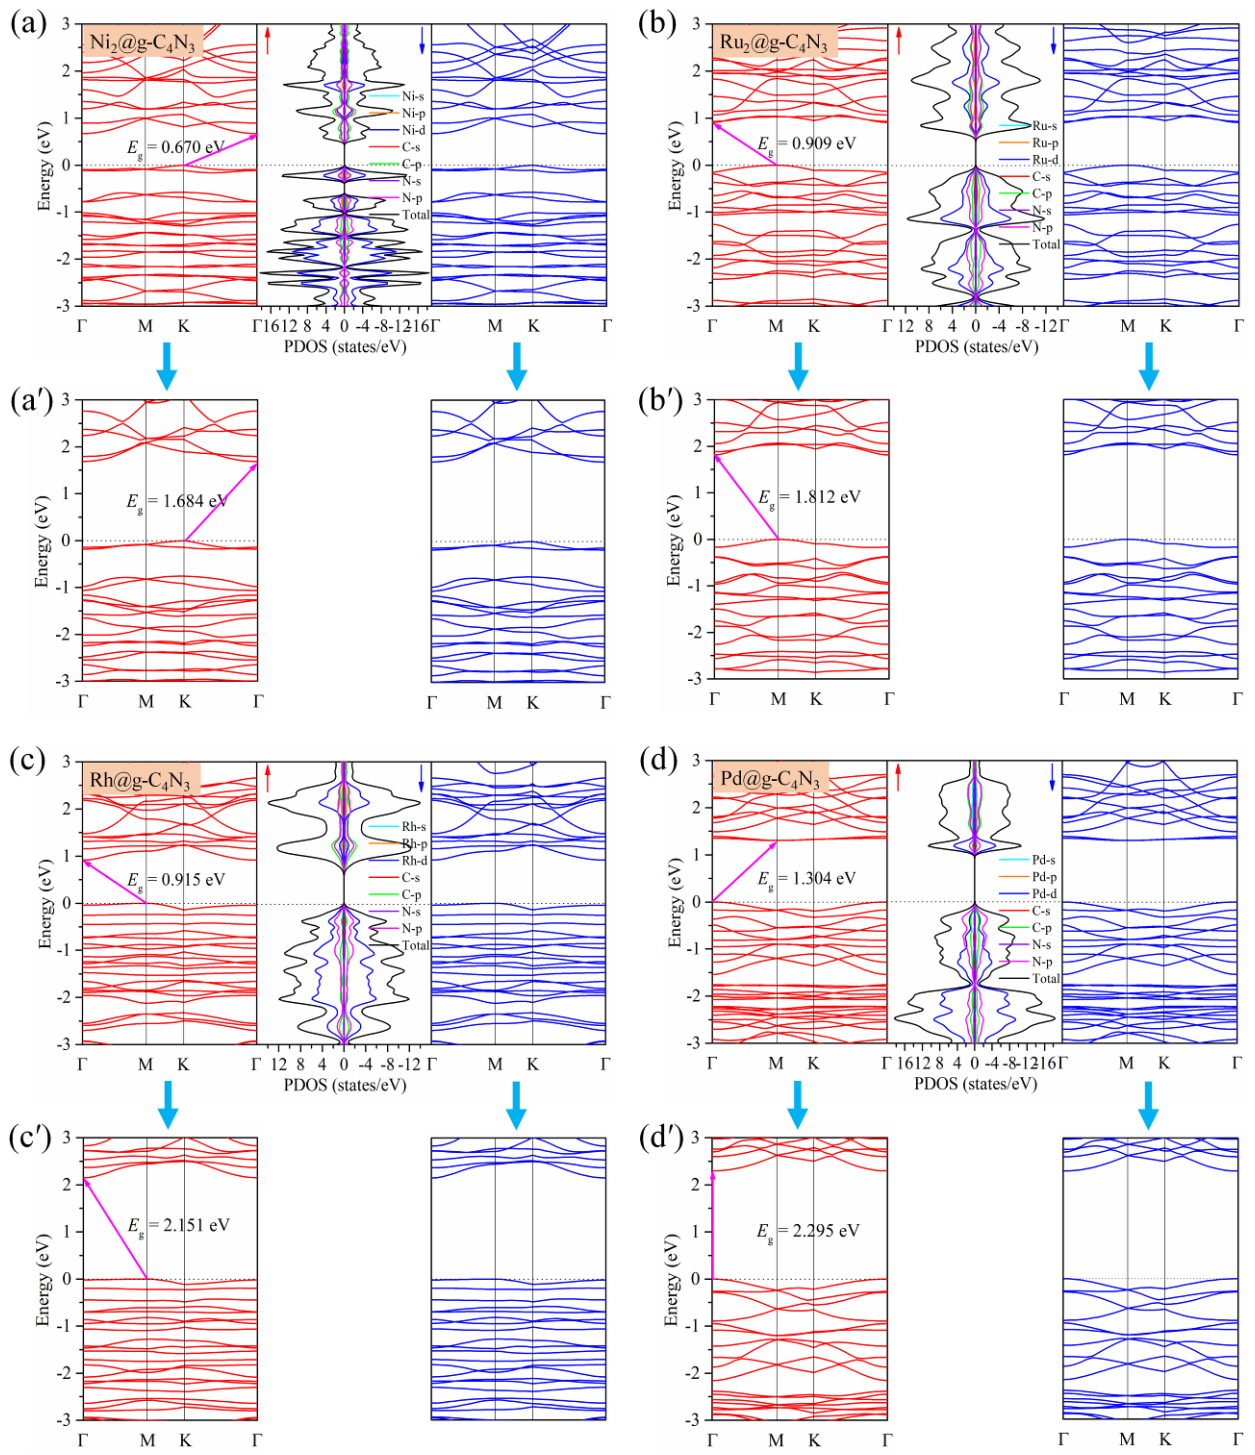

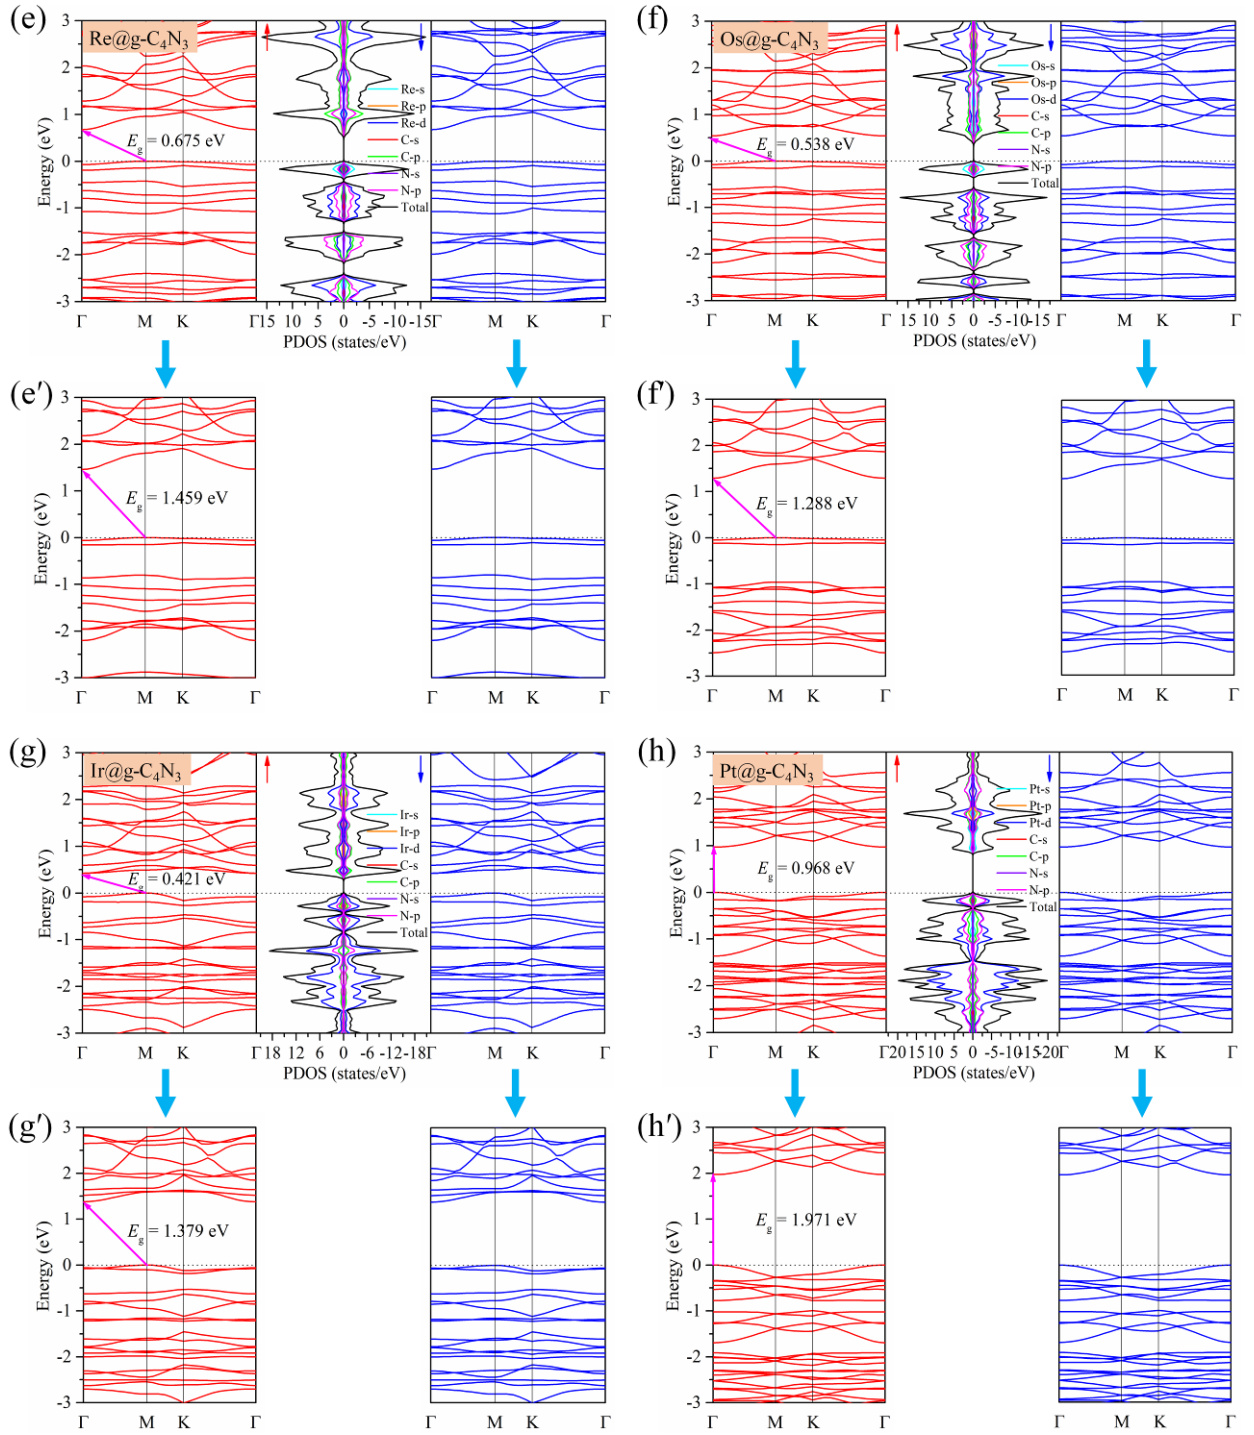

**Fig. S17** The band structures and PDOS for (a) Ni<sub>2</sub>@, (b) Ru<sub>2</sub>@, (c) Rh<sub>2</sub>@, (d) Pd<sub>2</sub>@, (e) Re<sub>2</sub>@, (f) Os<sub>2</sub>@, (g) Ir<sub>2</sub>@ and (h) Pt<sub>2</sub>@g-C<sub>4</sub>N<sub>3</sub> monolayers calculated at PBE+U level. (a')–(h') are band structures calculated at HSE06 level.  $\Gamma$  (0, 0, 0), M (0, 1/2, 0), and K (-1/3, 2/3, 0) are high symmetry points in the first Brillouin zone in reciprocal space. The PDOS of TM-*s*, TM-*p*, TM-*d*, C-*s*, C-*p*, N-*s*, N-*p*, and TDOS are plotted in light blue, orange, blue, red, green, violet, magenta, and black, respectively.

**Table S9** Band gap values (eV) of pristine g-C<sub>4</sub>N<sub>3</sub> and TM<sub>2</sub>@g-C<sub>4</sub>N<sub>3</sub> monolayers calculated at PBE+U and HSE06 levels, and the difference  $\Delta E$  (eV) between the band gaps calculated at the two levels.

| Structures                                       | Magnetic | PBE+U            | HSE06            | $\Delta E$       |
|--------------------------------------------------|----------|------------------|------------------|------------------|
| g-C <sub>4</sub> N <sub>3</sub>                  | FM       | Spin up: 2.208   | Spin up: 3.107   | Spin up: 0.899   |
|                                                  |          | Spin down: 0     | Spin down: 0     | Spin down: 0     |
| Sc <sub>2</sub> @g-C <sub>4</sub> N <sub>3</sub> | AFM2     | 0                | 0                | 0                |
| V <sub>2</sub> @g-C <sub>4</sub> N <sub>3</sub>  | AFM2     | 0                | 0                | 0                |
| Mn <sub>2</sub> @g-C <sub>4</sub> N <sub>3</sub> | AFM2     | 0                | 0                | 0                |
| Co <sub>2</sub> @g-C <sub>4</sub> N <sub>3</sub> | FM       | Spin up: 0.668   | Spin up: 1.864   | Spin up: 1.196   |
|                                                  |          | Spin down: 0.338 | Spin down: 1.408 | Spin down: 1.070 |
| Ni <sub>2</sub> @g-C <sub>4</sub> N <sub>3</sub> | AFM2     | 0.670            | 1.684            | 1.014            |
| Zn <sub>2</sub> @g-C <sub>4</sub> N <sub>3</sub> | NM       | 0                | 0                | 0                |
| Y <sub>2</sub> @g-C <sub>4</sub> N <sub>3</sub>  | NM       | 0                | 0                | 0                |
| Zr <sub>2</sub> @g-C <sub>4</sub> N <sub>3</sub> | FM       | Spin up: 0       | Spin up: 0       | Spin up: 0       |
|                                                  |          | Spin down: 0.967 | Spin down: 1.505 | Spin down: 0.538 |
| Ru <sub>2</sub> @g-C <sub>4</sub> N <sub>3</sub> | AFM1     | 0.909            | 1.812            | 0.903            |
| Rh <sub>2</sub> @g-C <sub>4</sub> N <sub>3</sub> | AFM1     | 0.915            | 2.151            | 1.236            |
| Pd <sub>2</sub> @g-C <sub>4</sub> N <sub>3</sub> | AFM2     | 1.304            | 2.295            | 0.991            |
| Cd <sub>2</sub> @g-C <sub>4</sub> N <sub>3</sub> | NM       | 0                | 0                | 0                |
| Lu <sub>2</sub> @g-C <sub>4</sub> N <sub>3</sub> | NM       | 0                | 0                | 0                |
| Hf <sub>2</sub> @g-C <sub>4</sub> N <sub>3</sub> | NM       | 0                | 0                | 0                |
| Re <sub>2</sub> @g-C <sub>4</sub> N <sub>3</sub> | AFM1     | 0.675            | 1.459            | 0.784            |
| Os <sub>2</sub> @g-C <sub>4</sub> N <sub>3</sub> | AFM1     | 0.538            | 1.288            | 0.750            |
| Ir <sub>2</sub> @g-C <sub>4</sub> N <sub>3</sub> | AFM1     | 0.421            | 1.379            | 0.958            |
| Pt <sub>2</sub> @g-C <sub>4</sub> N <sub>3</sub> | AFM1     | 0.968            | 1.971            | 1.003            |

(a)  $g\text{-C}_4\text{N}_3$  top view

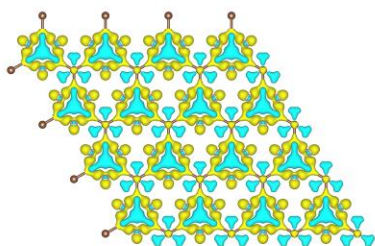

side view

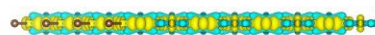

(b)  $\text{Sc}_2@g\text{-C}_4\text{N}_3$  top view

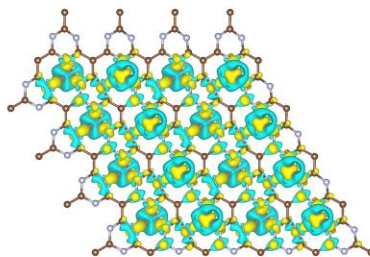

side view

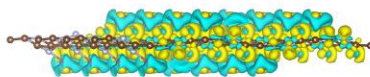

(c)  $\text{V}_2@g\text{-C}_4\text{N}_3$  top view

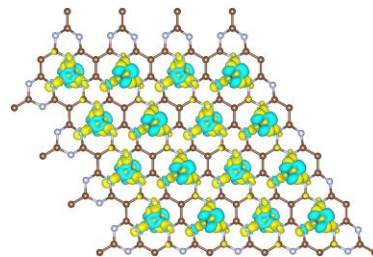

side view

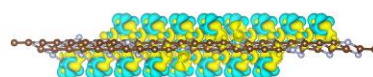

(d)  $\text{Mn}_2@g\text{-C}_4\text{N}_3$  top view

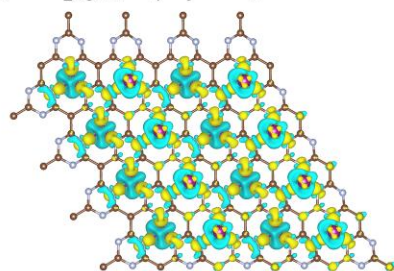

side view

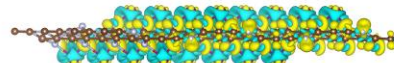

(e)  $\text{Co}_2@g\text{-C}_4\text{N}_3$  top view

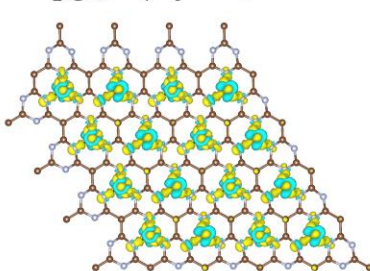

side view

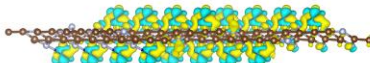

(f)  $\text{Ni}_2@g\text{-C}_4\text{N}_3$  top view

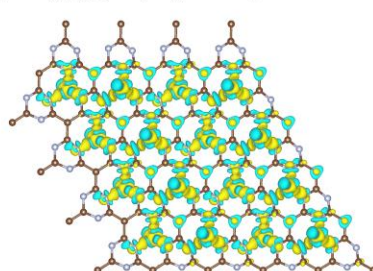

side view

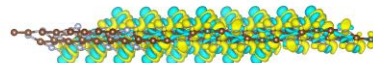

(g)  $\text{Zn}_2@g\text{-C}_4\text{N}_3$  top view

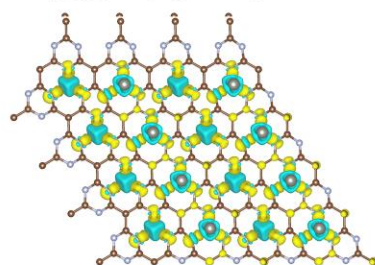

side view

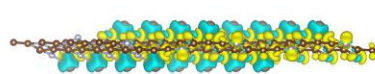

(h)  $\text{Y}_2@g\text{-C}_4\text{N}_3$  top view

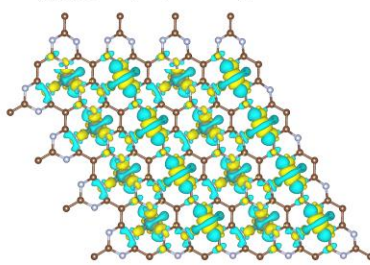

side view

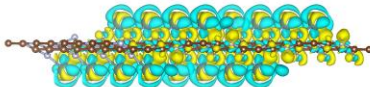

(i)  $\text{Zr}_2@g\text{-C}_4\text{N}_3$  top view

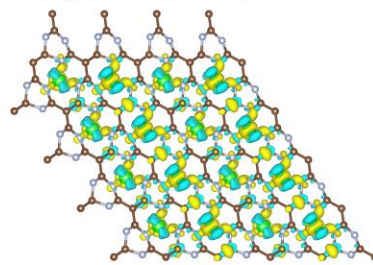

side view

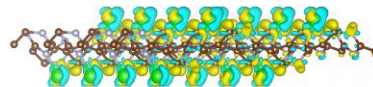

(j)  $\text{Ru}_2@g\text{-C}_4\text{N}_3$  top view

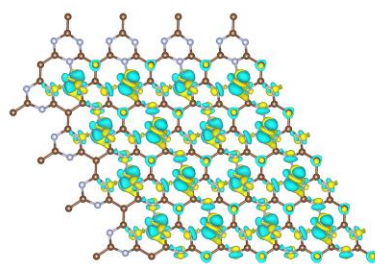

side view

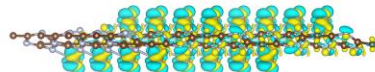

(k)  $\text{Rh}_2@g\text{-C}_4\text{N}_3$  top view

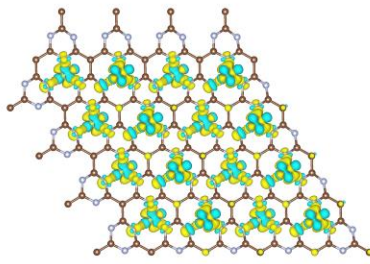

side view

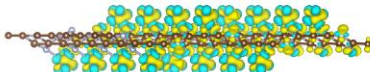

(l)  $\text{Pd}_2@g\text{-C}_4\text{N}_3$  top view

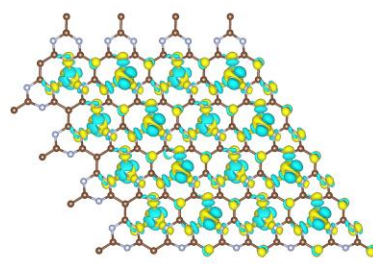

side view

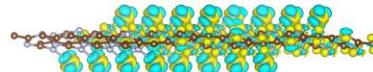

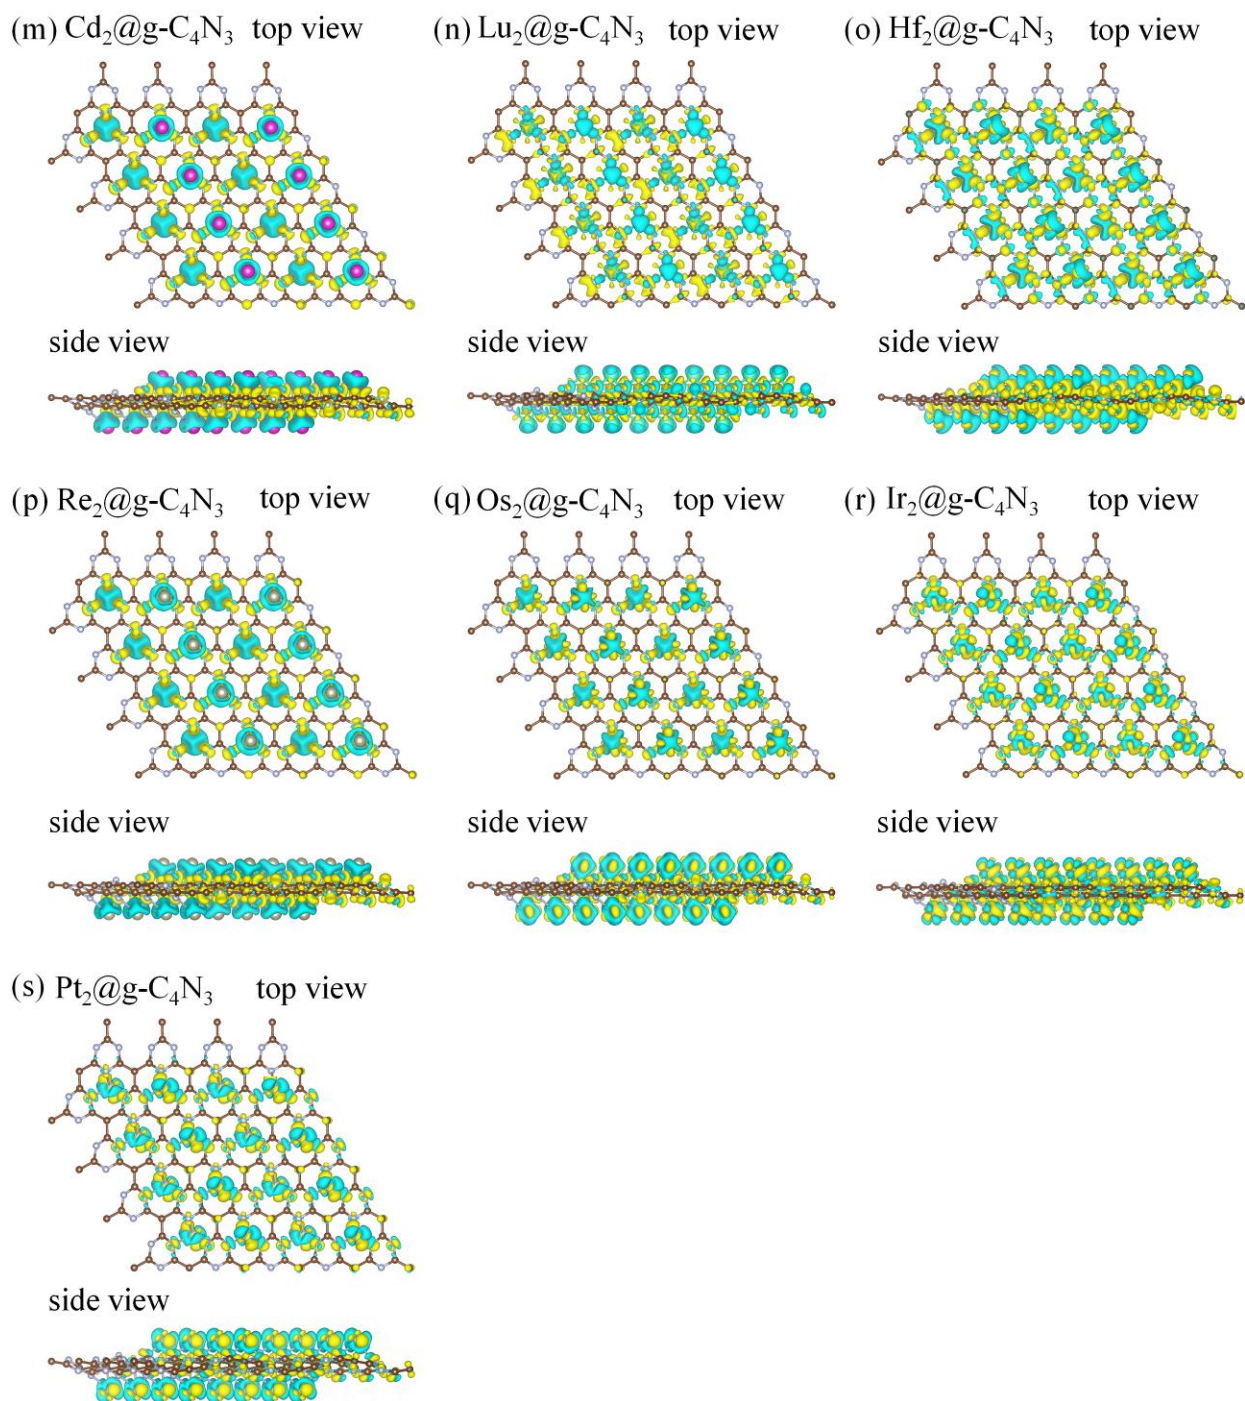

**Fig. S18** Top and side views of the charge density difference for 2D periodic (a)  $\text{g-C}_4\text{N}_3$ , (b)  $\text{Sc}_2@$ , (c)  $\text{V}_2@$ , (d)  $\text{Mn}_2@$ , (e)  $\text{Co}_2@$ , (f)  $\text{Ni}_2@$ , (g)  $\text{Zn}_2@$ , (h)  $\text{Y}_2@$ , (i)  $\text{Zr}_2@$ , (j)  $\text{Ru}_2@$ , (k)  $\text{Rh}_2@$ , (l)  $\text{Pd}_2@$ , (m)  $\text{Cd}_2@$ , (n)  $\text{Lu}_2@$ , (o)  $\text{Hf}_2@$ , and (p)  $\text{Re}_2@$ , (q)  $\text{Os}_2@$ , (r)  $\text{Ir}_2@$ , and (s)  $\text{Pt}_2@\text{g-C}_4\text{N}_3$  monolayers in  $2 \times 2 \times 1$  supercells at an isosurface value of  $0.01 \text{ e } \text{\AA}^{-3}$ . Yellow and blue bubbles represent charge accumulation and depletion, respectively.

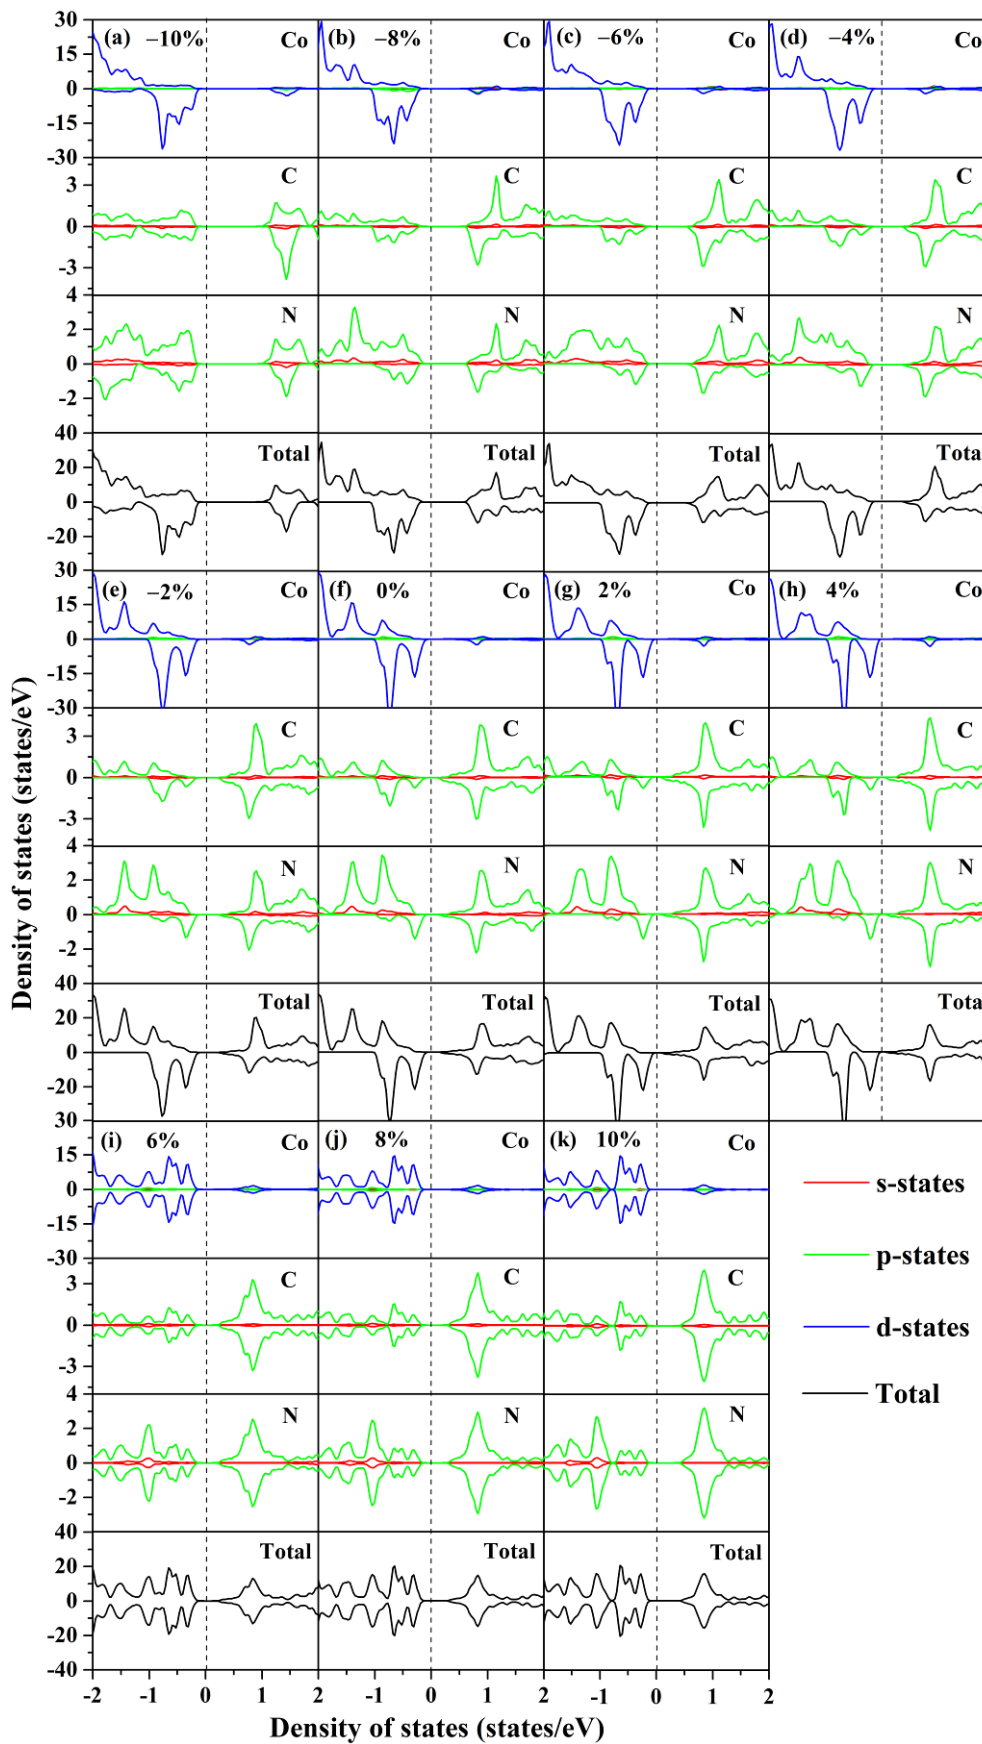

**Fig. S19** The evolution of PDOS of different atoms near the Fermi level versus biaxial strains from  $-10\%$  to  $10\%$  for  $\text{Co}_2@g\text{-C}_4\text{N}_3$  monolayer. The Fermi level has been set to  $0\text{ eV}$ .

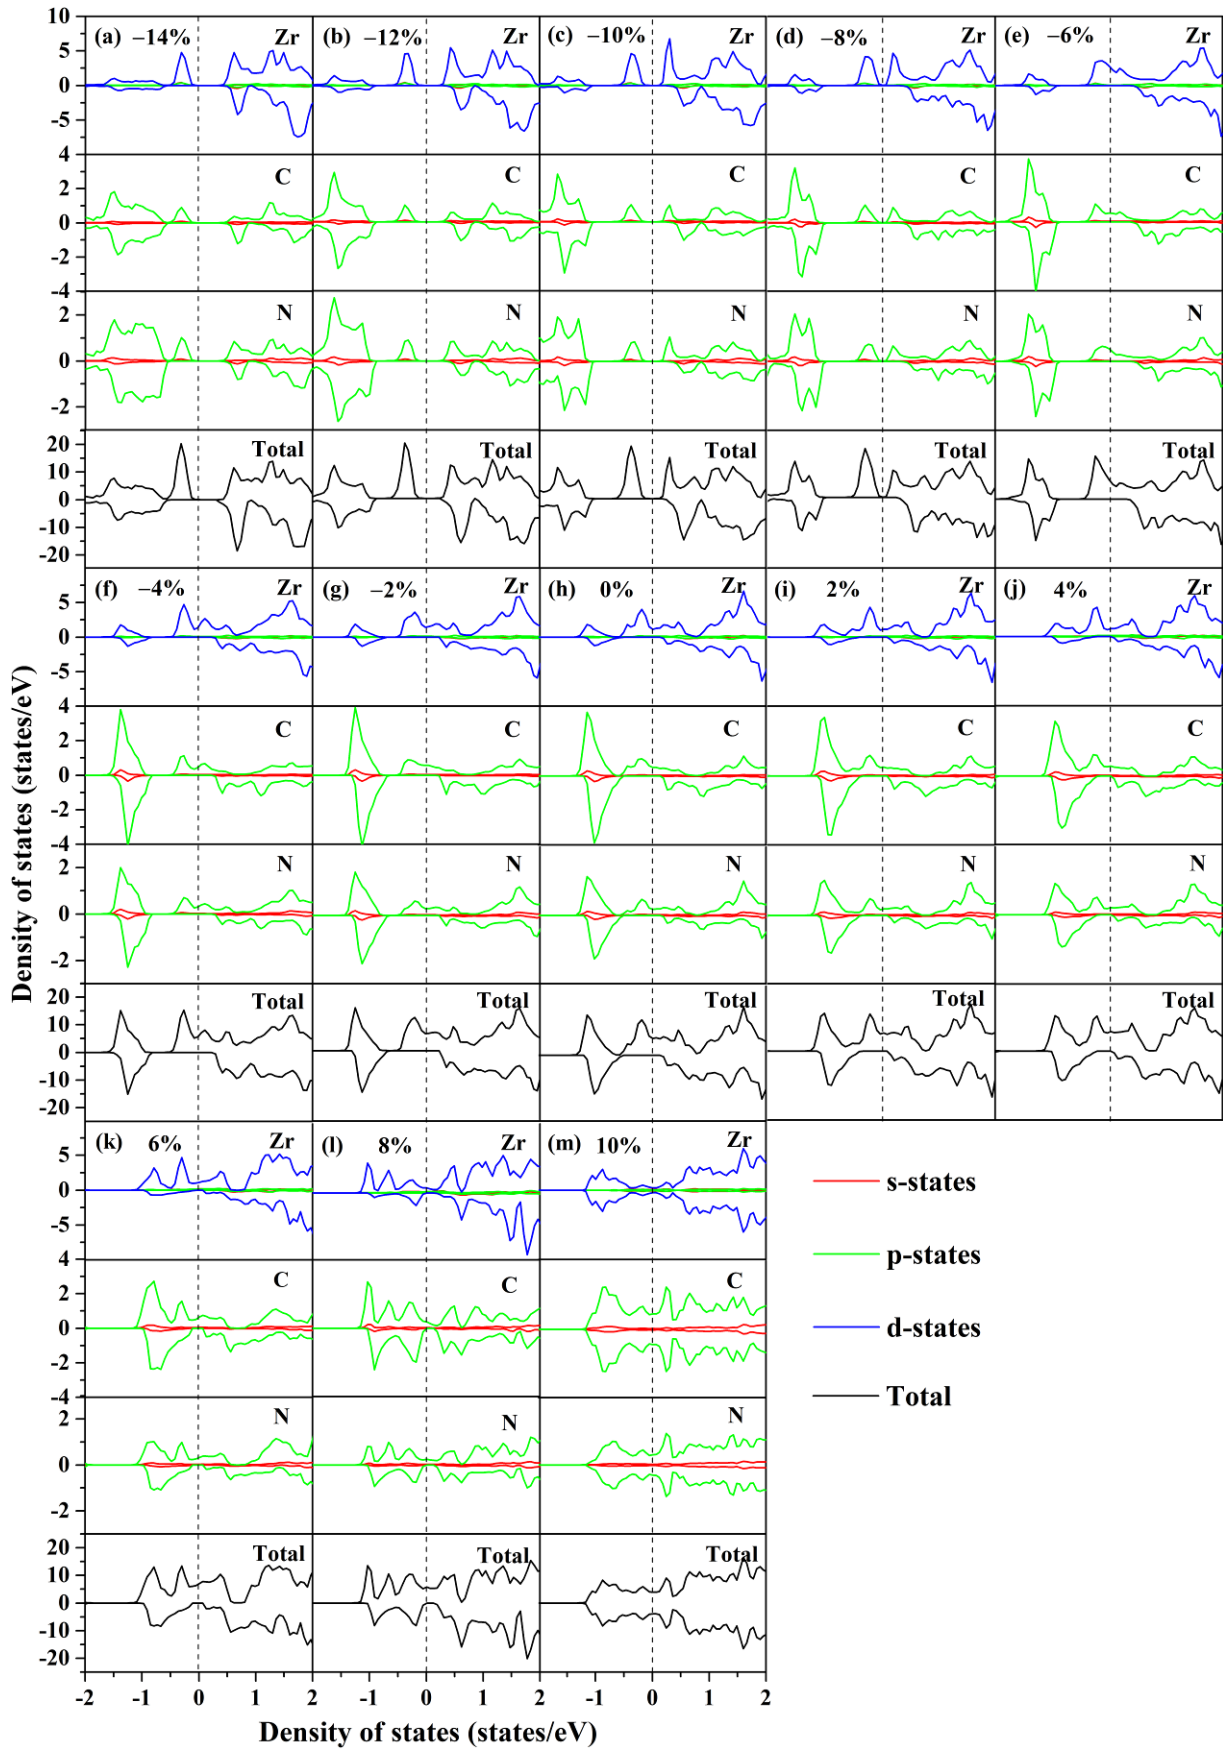

**Fig. S20** The evolution of PDOS of different atoms near the Fermi level versus biaxial strains from  $-14\%$  to  $10\%$  for  $\text{Zr}_2@\text{g-C}_4\text{N}_3$  monolayer. The Fermi level has been set to  $0$  eV.

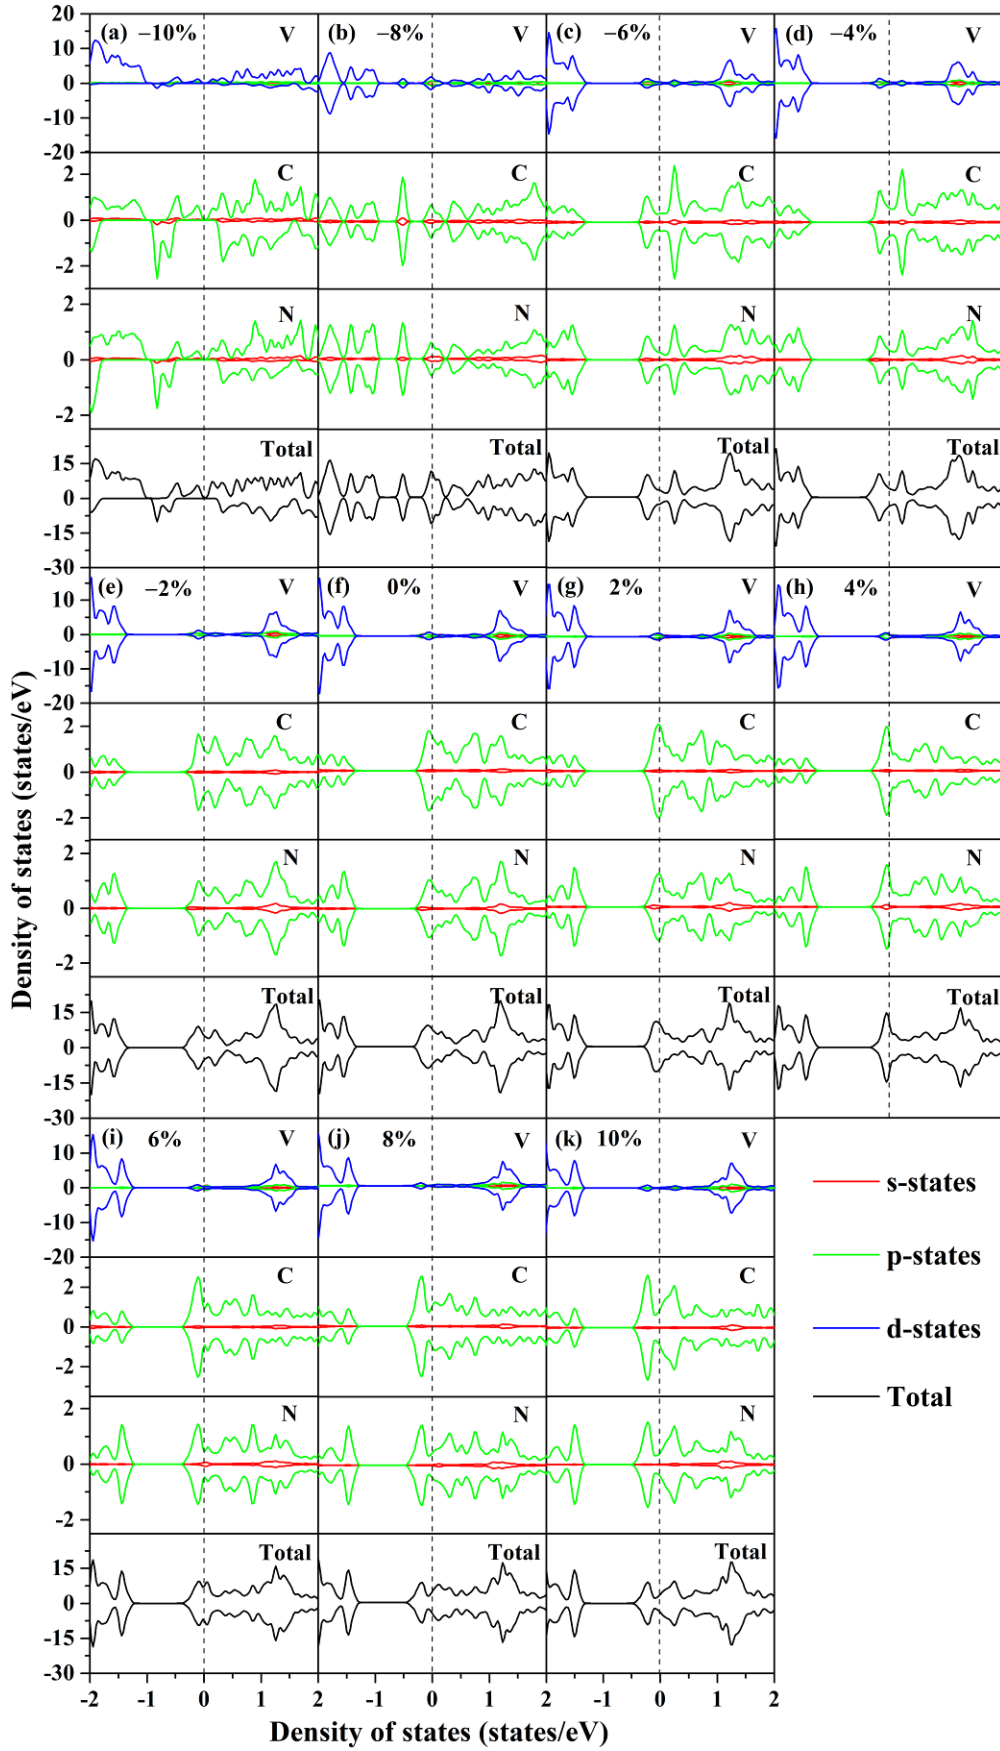

**Fig. S21** The evolution of PDOS of different atoms near the Fermi level versus biaxial strains from  $-10\%$  to  $10\%$  for  $V_2@g-C_4N_3$  monolayer. The Fermi level has been set to  $0$  eV.



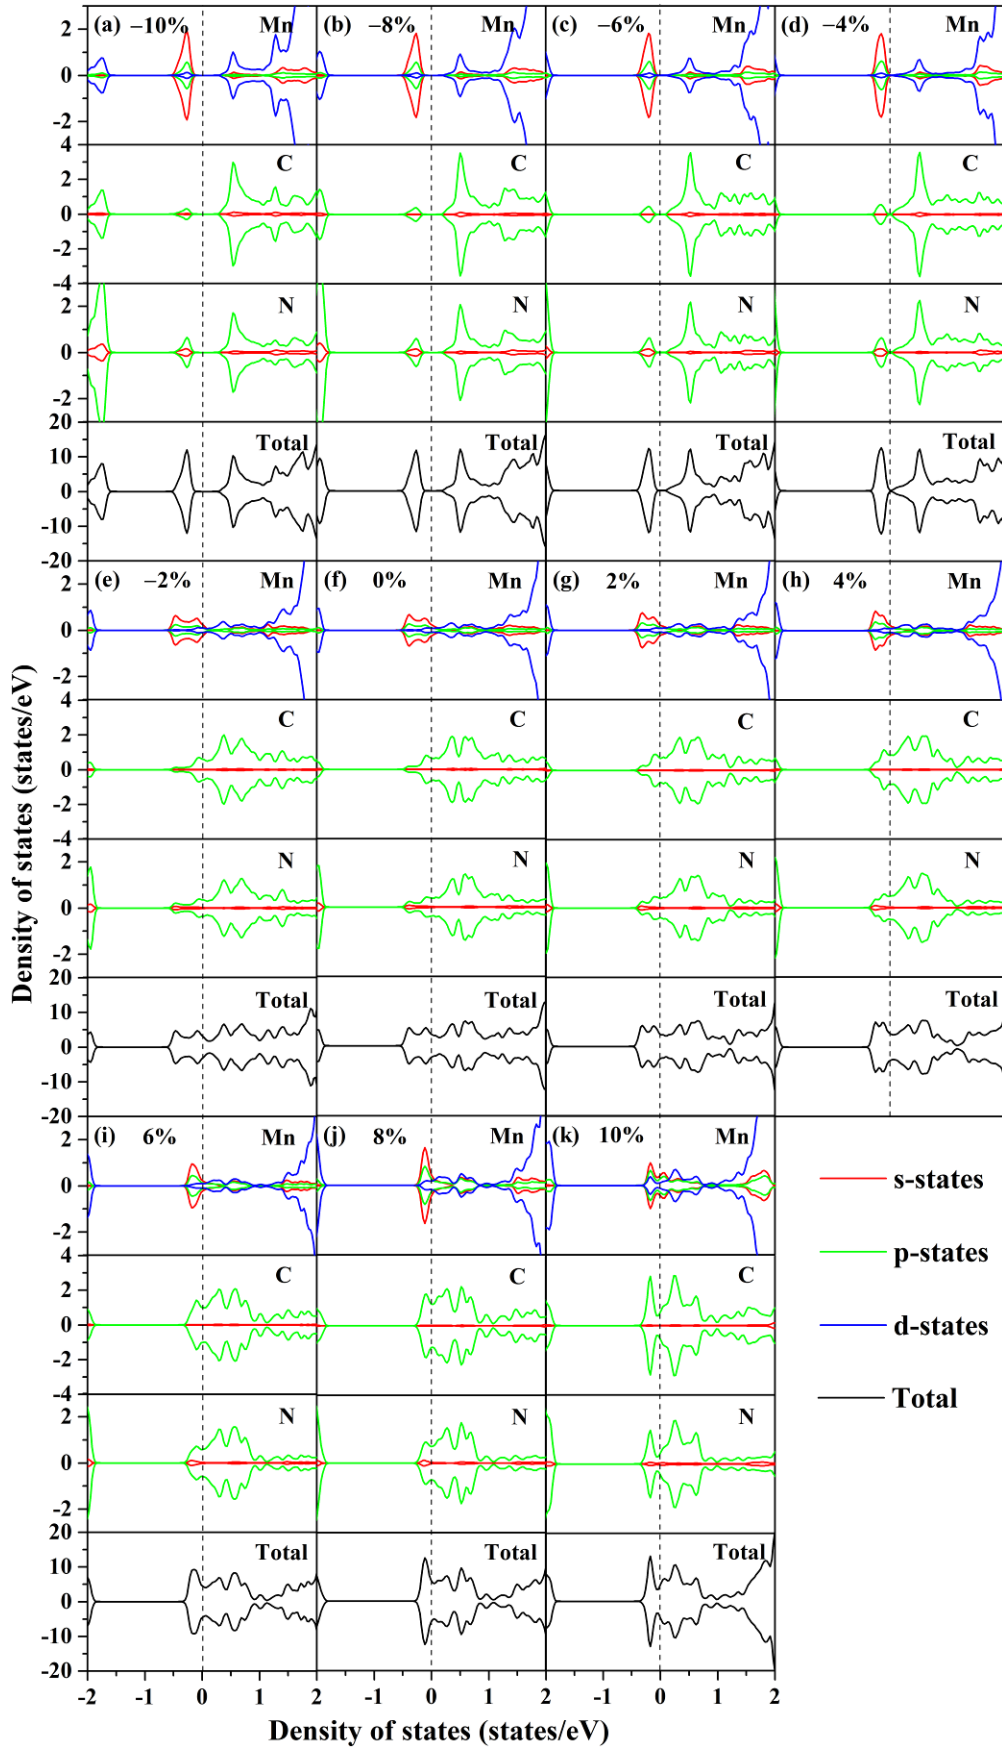

**Fig. S22** The evolution of PDOS of different atoms near the Fermi level versus biaxial strains from  $-10\%$  to  $10\%$  for  $\text{Mn}_2@g\text{-C}_4\text{N}_3$  monolayer. The Fermi level has been set to  $0\text{ eV}$ .

## (6) Optical properties

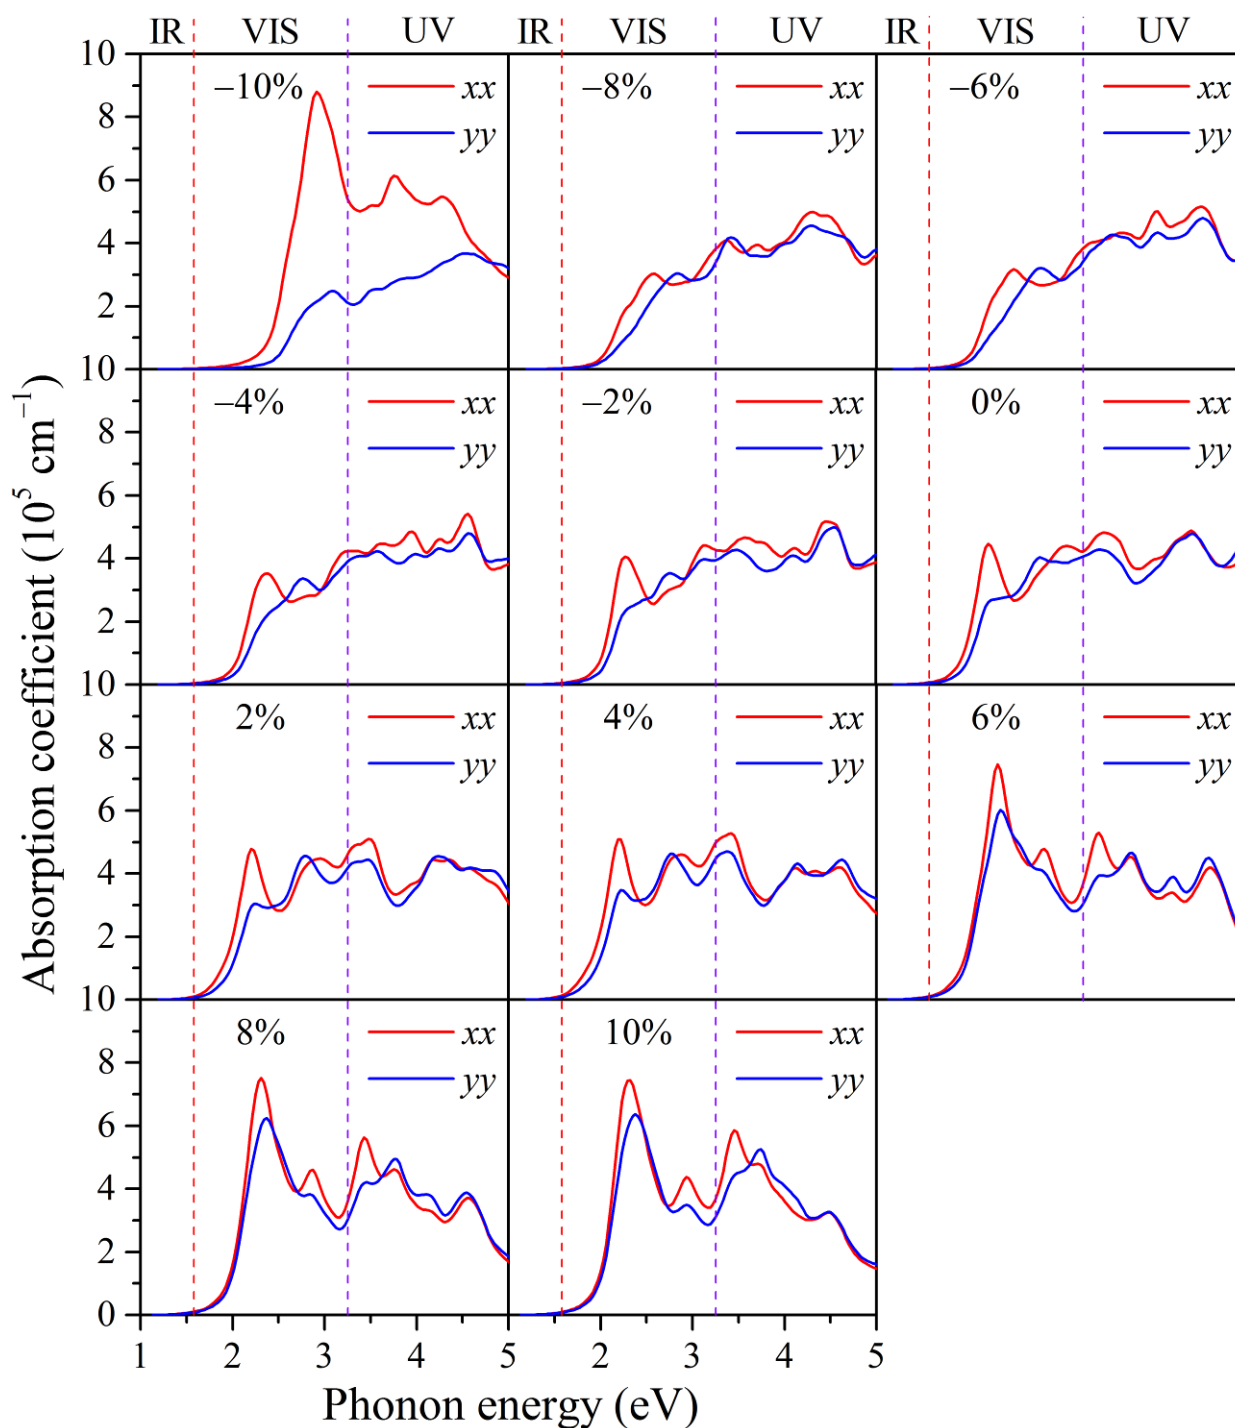

**Fig. S23** The evolution of optical absorption coefficient versus biaxial strains from -10% to 10% for  $\text{Co}_2@ \text{g-C}_4\text{N}_3$  monolayers. The infrared, visible and ultraviolet regions are marked by red and purple dashed lines.

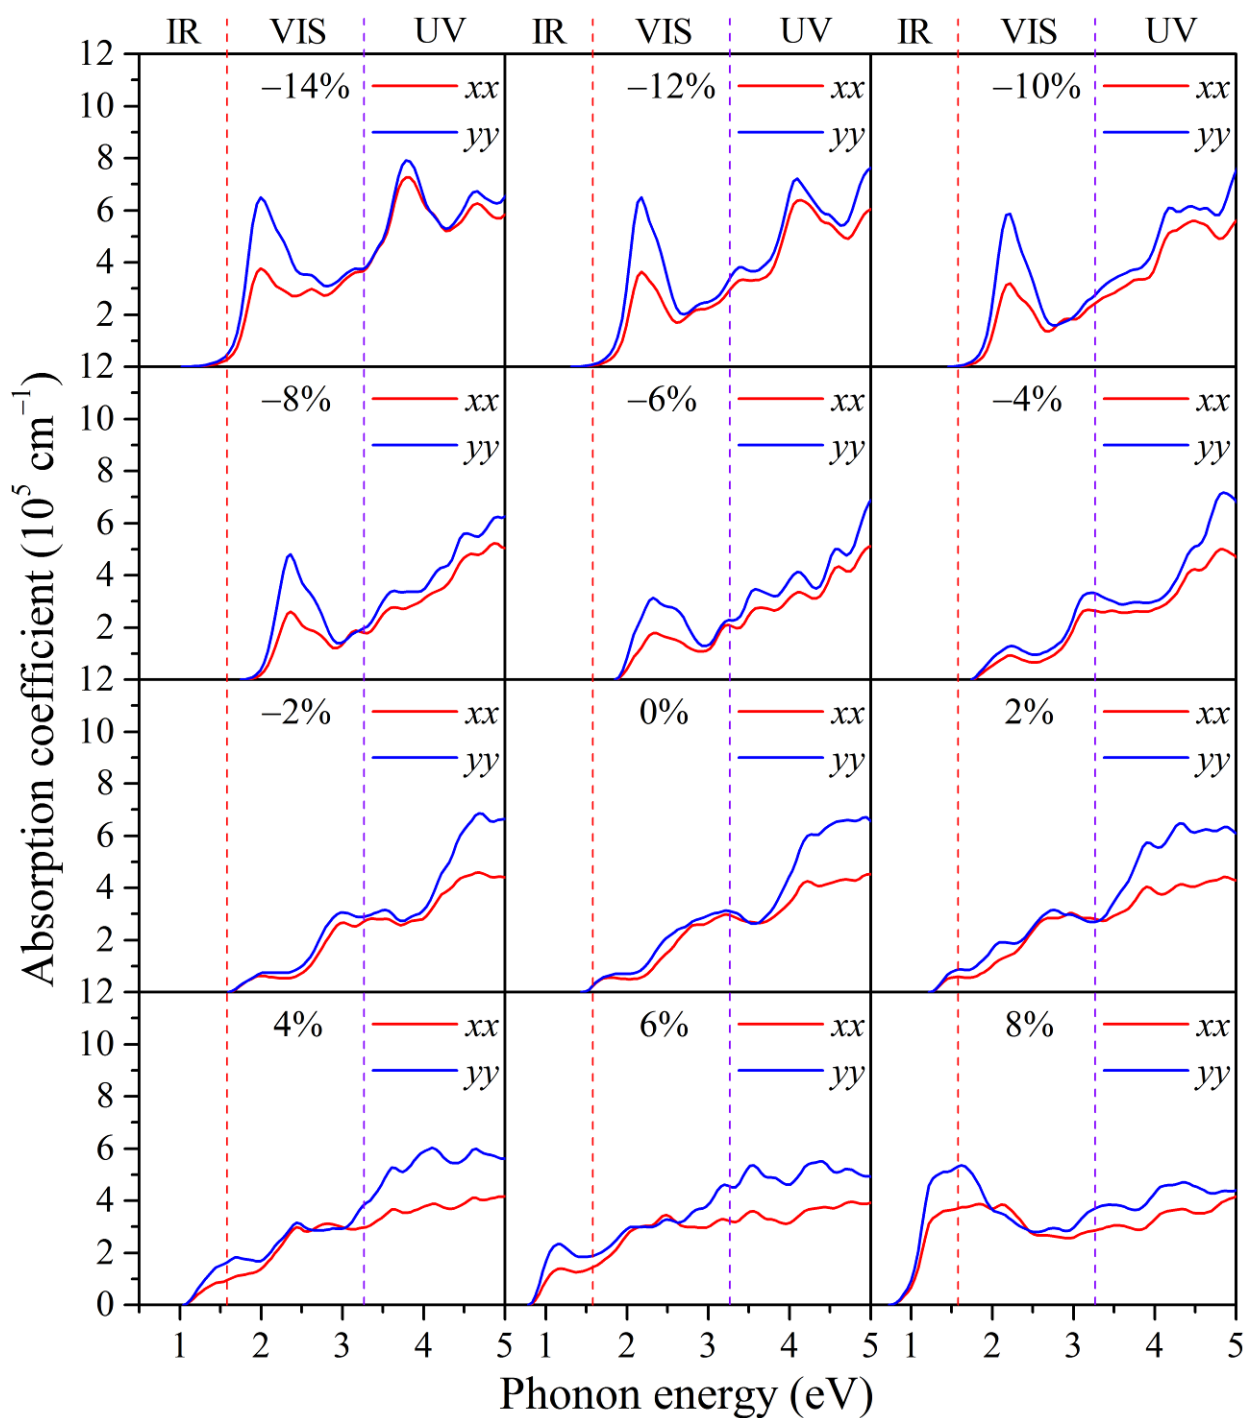

**Fig. S24** The evolution of optical absorption coefficient versus biaxial strains from  $-14\%$  to  $8\%$  for  $\text{Zr}_2\text{@g-C}_4\text{N}_3$  monolayers. The infrared, visible and ultraviolet regions are marked by red and purple dashed lines.
